# Supplementary material for: Synthesis of Cobalt Bis(Dicarbollide)—Curcumin Conjugates for Potential Use in Boron Neutron Capture Therapy
Source: MDPI journal article supplement (doi:10.3390/molecules27144658), 2022-07-21
Supplement: s1 [file s1]

## **SUPPORTING INFORMATION**

### **Synthesis of Cobalt Bis(Dicarbollide) – Curcumin Conjugates for Potential Use in Boron Neutron Capture Therapy**

**Lyubov G. Dezhenkova 1, Anna A. Druzina 2,\* , Yulia L. Volodina 3, Nadezhda V. Dudarova 2 , Natalia A. Nekrasova 2,4, Olga B. Zhidkova 2, Mikhail A. Grin 4 and Vladimir I. Bregadze 2**

1 Gause Institute of New Antibiotics, 11 B. Pirogovskaya Street, 119021 Moscow, Russia;  
dezhenkovalg@yahoo.com

2 A.N. Nesmeyanov Institute of Organoelement Compounds, Russian Academy of Sciences, 28 Vavilov Str.,

119991 Moscow, Russia; nadezjdino\_96@mail.ru (N.V.D.); nekrasova\_na@list.ru (N.A.N.);  
zolga57@mail.ru (O.B.Z.); bre@ineos.ac.ru (V.I.B.)

3 Blokhin Cancer Center, 24 Kashirskoye Shosse, 115478 Moscow, Russia; uvo2003@mail.ru

4 M.V. Lomonosov Institute of Fine Chemical Technology, MIREA – Russian Technological University,  
86 Vernadsky Av., 119571 Moscow, Russia; michael\_grin@mail.ru

\* Correspondence: ilinova\_anna@mail.ru; Tel.: +7-926-404-5566

<sup>1</sup>H, <sup>11</sup>B and <sup>13</sup>C NMR, IR and high-resolution mass spectra of compounds **4-7**

## Display Report

### Analysis Info

Analysis Name D:\Data\Chizhov\INEOS\Druzina\da-043\_&clb-.d  
Method tune\_wide\_neg.m  
Sample Name /CHIZ DA-043  
Comment CH3OH 100 %, dil. 200, calibrant added

Acquisition Date 24.05.2022 16:09:46

Operator BDAL@DE  
Instrument / Ser# maXis 43

### Acquisition Parameter

|             |          |                      |          |                  |           |
|-------------|----------|----------------------|----------|------------------|-----------|
| Source Type | ESI      | Ion Polarity         | Negative | Set Nebulizer    | 0.4 Bar   |
| Focus       | Active   |                      |          | Set Dry Heater   | 180 °C    |
| Scan Begin  | 50 m/z   | Set Capillary        | 3000 V   | Set Dry Gas      | 4.0 l/min |
| Scan End    | 3000 m/z | Set End Plate Offset | -500 V   | Set Divert Valve | Waste     |

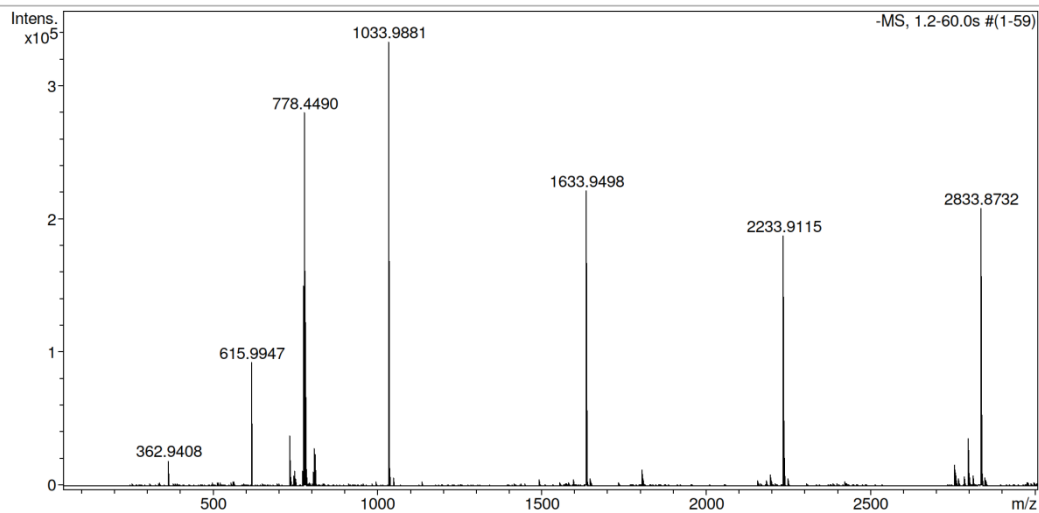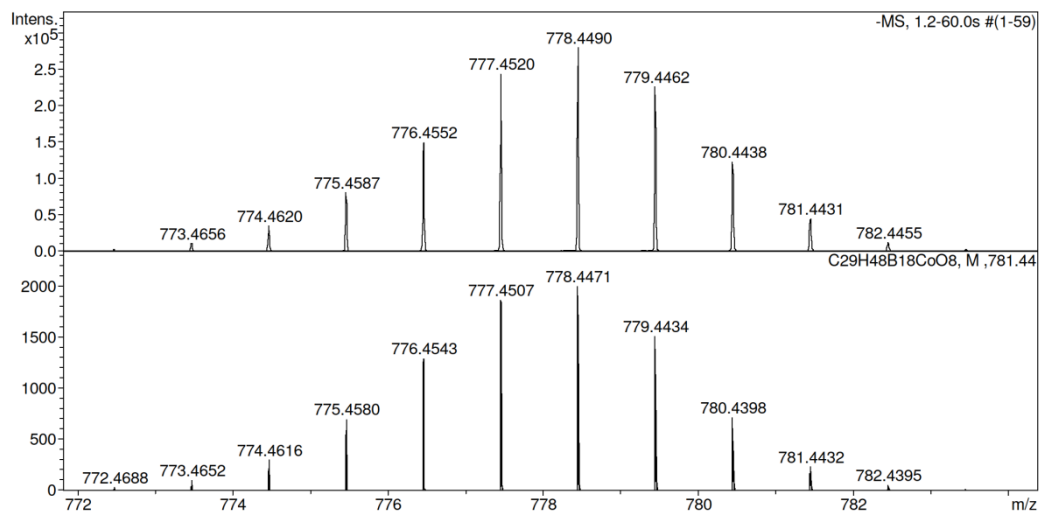

**Figure S1.** ESI-HRMS spectrum of compound **4**

## Display Report

### Analysis Info

Analysis Name D:\Data\Chizhov\INEOS\Druzina\da-042\_&clblow-.d  
Method tune\_low\_neg\_1050.m  
Sample Name /CHIZ DA-042  
Comment CH3OH 100 %, dil. 200, calibrant added

Acquisition Date 24.05.2022 16:01:27

Operator BDAL@DE  
Instrument / Ser# maXis 43

### Acquisition Parameter

|             |            |                      |          |                  |           |
|-------------|------------|----------------------|----------|------------------|-----------|
| Source Type | ESI        | Ion Polarity         | Negative | Set Nebulizer    | 0.4 Bar   |
| Focus       | Not active |                      |          | Set Dry Heater   | 180 °C    |
| Scan Begin  | 50 m/z     | Set Capillary        | 2000 V   | Set Dry Gas      | 4.0 l/min |
| Scan End    | 1050 m/z   | Set End Plate Offset | -500 V   | Set Divert Valve | Source    |

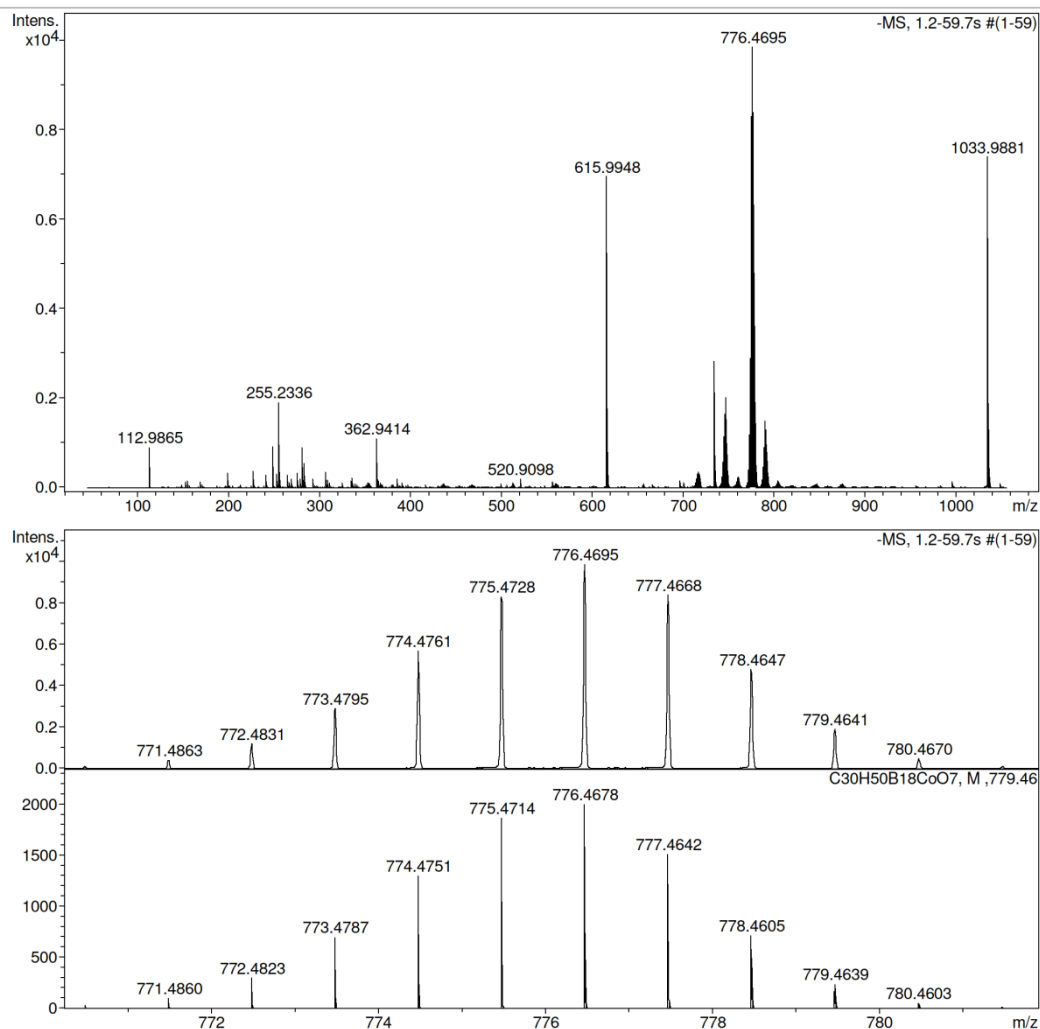

**Figure S2.** ESI-HRMS spectrum of compound 5

## Display Report

### Analysis Info

Analysis Name D:\Data\Chizhov\INEOS\Druzina\da-044\_&clb-.d  
Method tune\_wide\_neg.m  
Sample Name /CHIZ DA-044  
Comment CH3OH 100 %, dil. 200, calibrant added

Acquisition Date 24.05.2022 16:17:44

Operator BDAL@DE  
Instrument / Ser# maXis 43

### Acquisition Parameter

|             |          |                      |          |                  |           |
|-------------|----------|----------------------|----------|------------------|-----------|
| Source Type | ESI      | Ion Polarity         | Negative | Set Nebulizer    | 0.4 Bar   |
| Focus       | Active   |                      |          | Set Dry Heater   | 180 °C    |
| Scan Begin  | 50 m/z   | Set Capillary        | 3000 V   | Set Dry Gas      | 4.0 l/min |
| Scan End    | 3000 m/z | Set End Plate Offset | -500 V   | Set Divert Valve | Waste     |

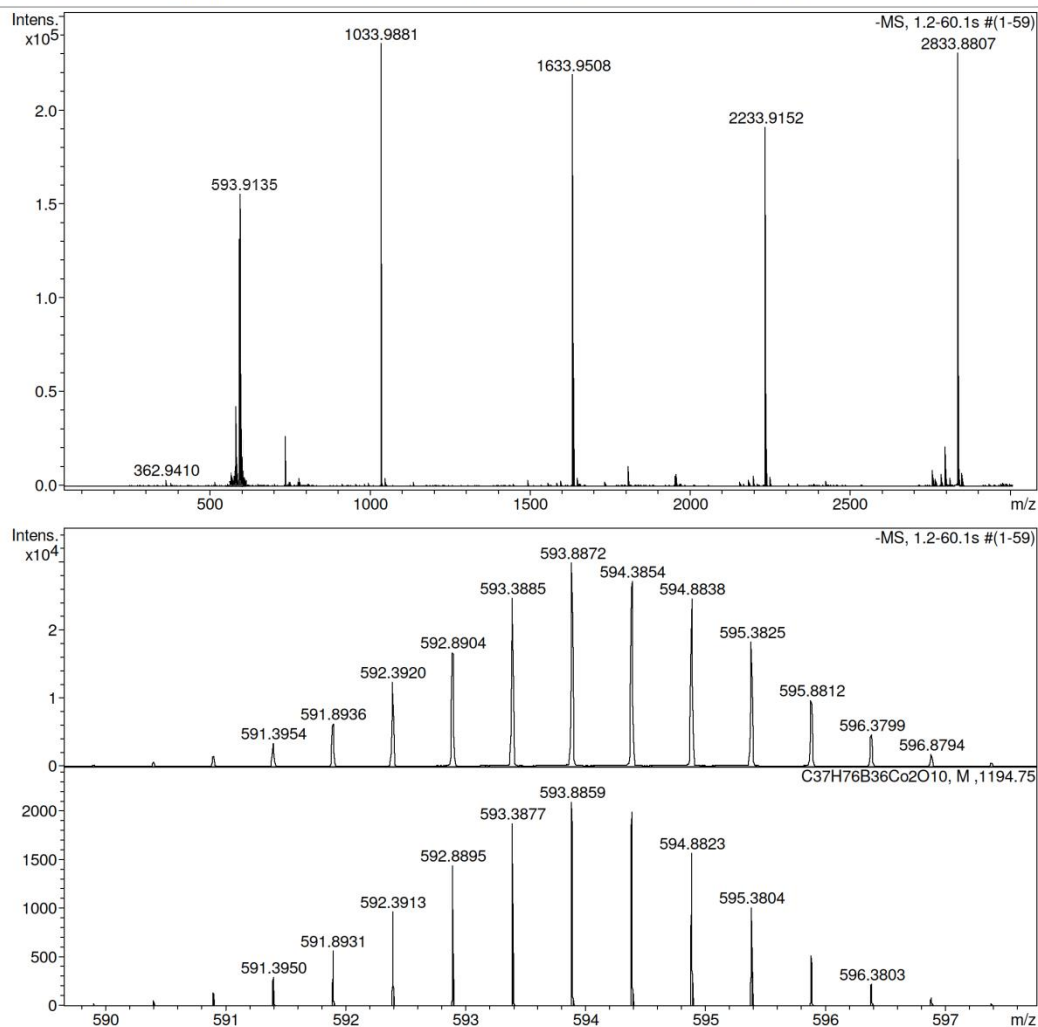

Figure S3. ESI-HRMS spectrum of compound 6

## Display Report

### Analysis Info

Analysis Name D:\Data\Chizhov\INEOS\Bregadze\Druzina\Jan\_17\_2022\da-045-2\_&clb-.d  
Method tune\_wide\_neg.m  
Sample Name /CHIZ DA-045-2  
Comment CH3CN 100 %, dil. 20, calibrant added

Acquisition Date 17.01.2022 19:26:09  
Operator BDAL@DE  
Instrument / Ser# microTOF 10248

### Acquisition Parameter

|             |            |                      |          |                  |           |
|-------------|------------|----------------------|----------|------------------|-----------|
| Source Type | ESI        | Ion Polarity         | Negative | Set Nebulizer    | 0.4 Bar   |
| Focus       | Not active |                      |          | Set Dry Heater   | 180 °C    |
| Scan Begin  | 50 m/z     | Set Capillary        | 3200 V   | Set Dry Gas      | 4.0 l/min |
| Scan End    | 3000 m/z   | Set End Plate Offset | -500 V   | Set Divert Valve | Waste     |

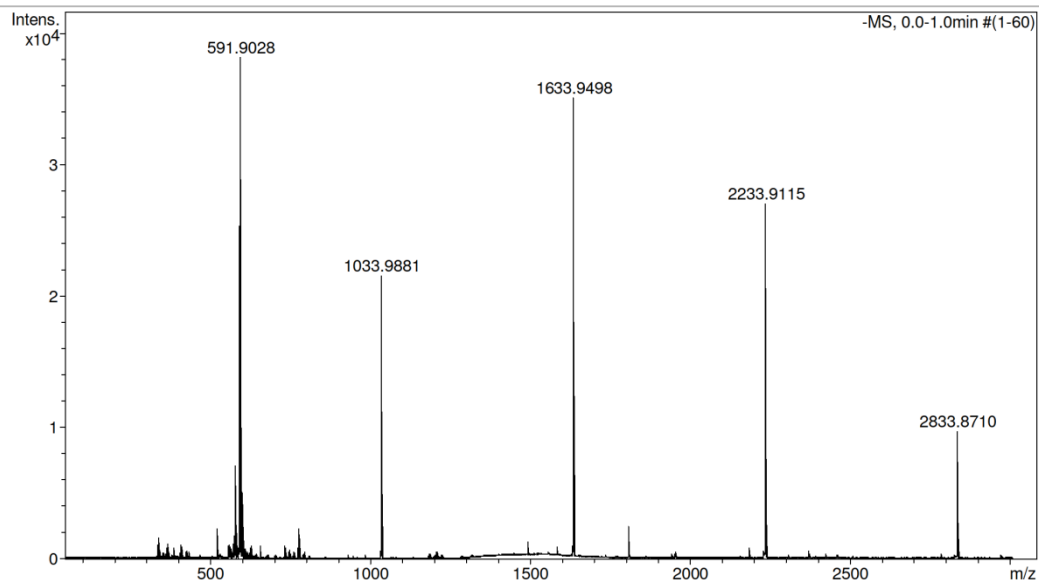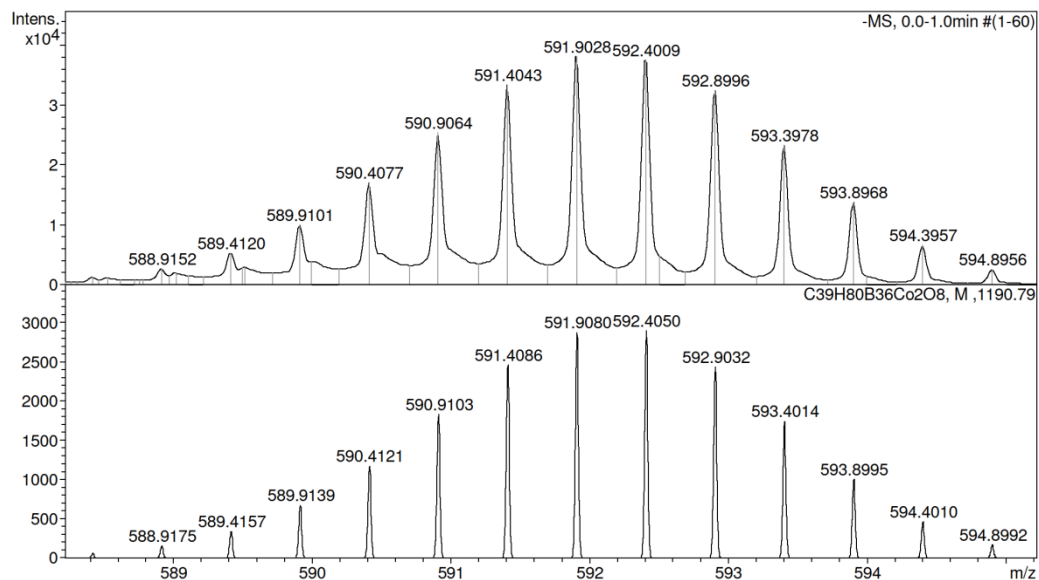

Figure S4. ESI-HRMS spectrum of compound 7

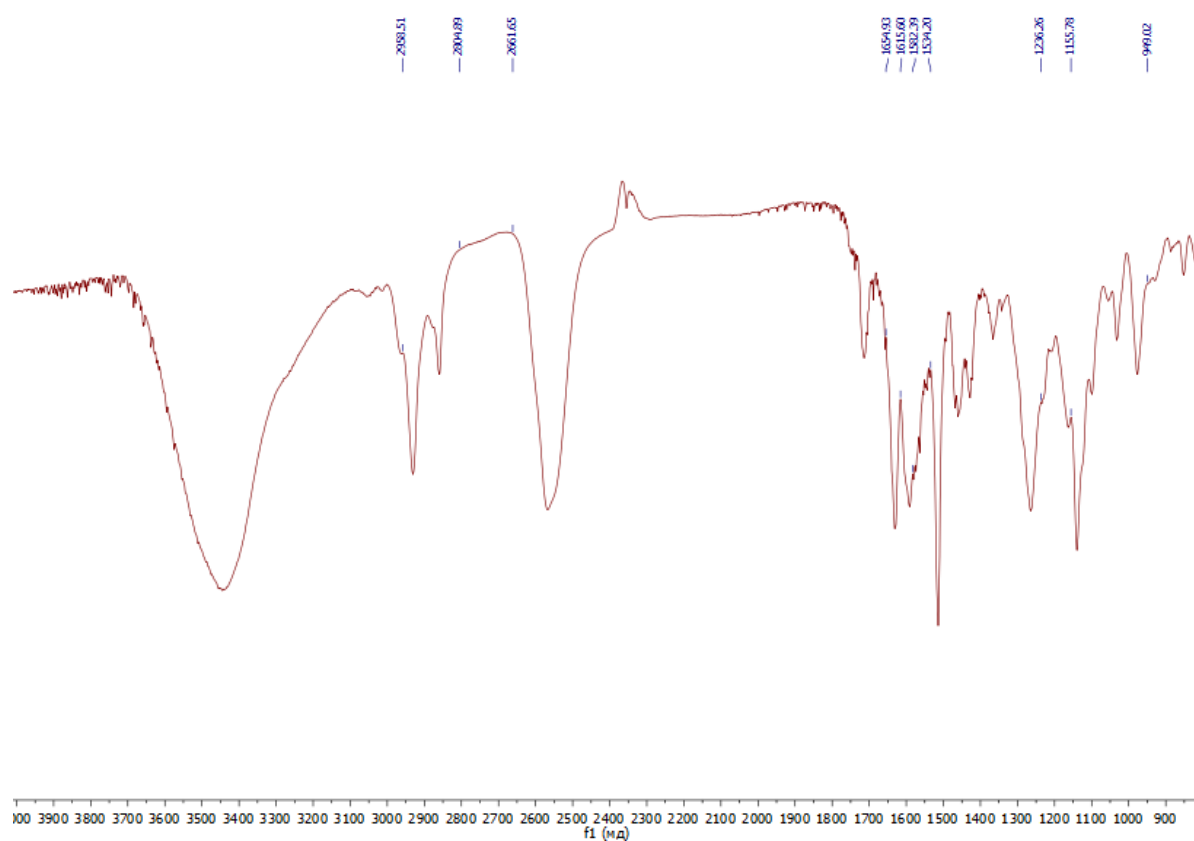

Figure S5. IR spectrum of compound 4

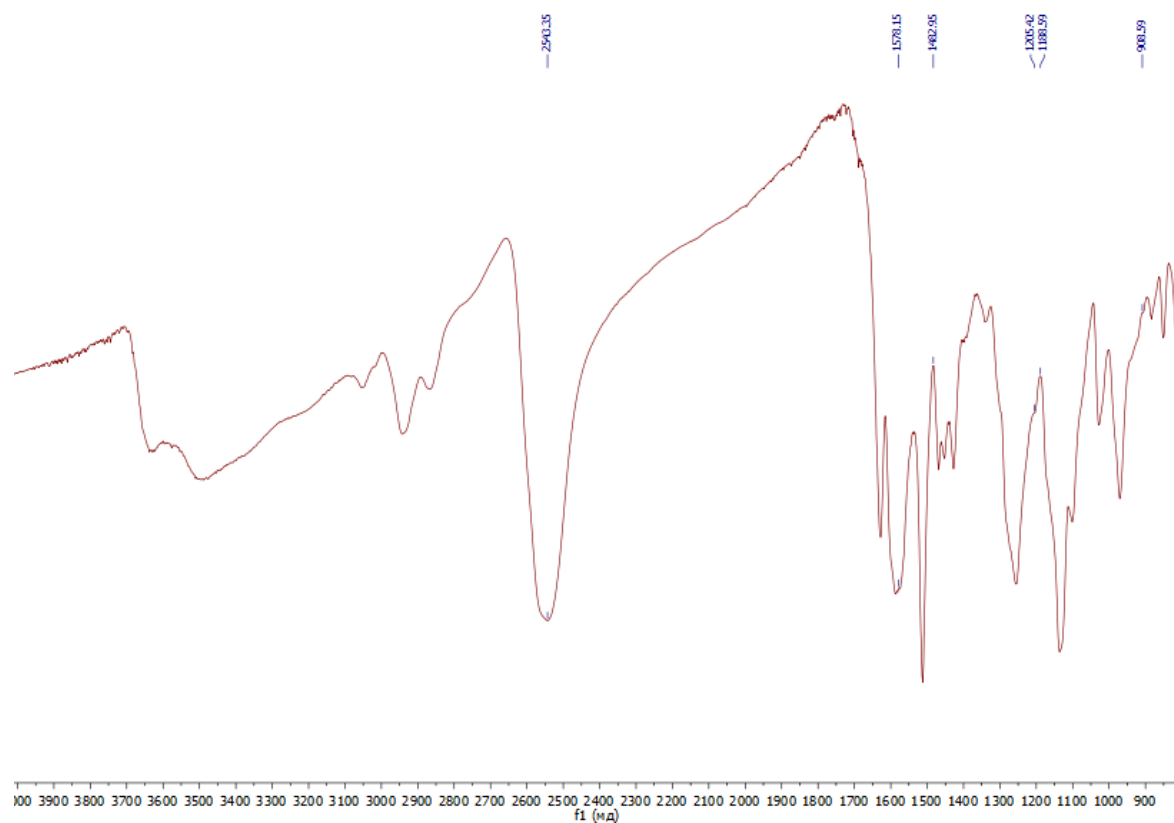

Figure S6. IR spectrum of compound 5

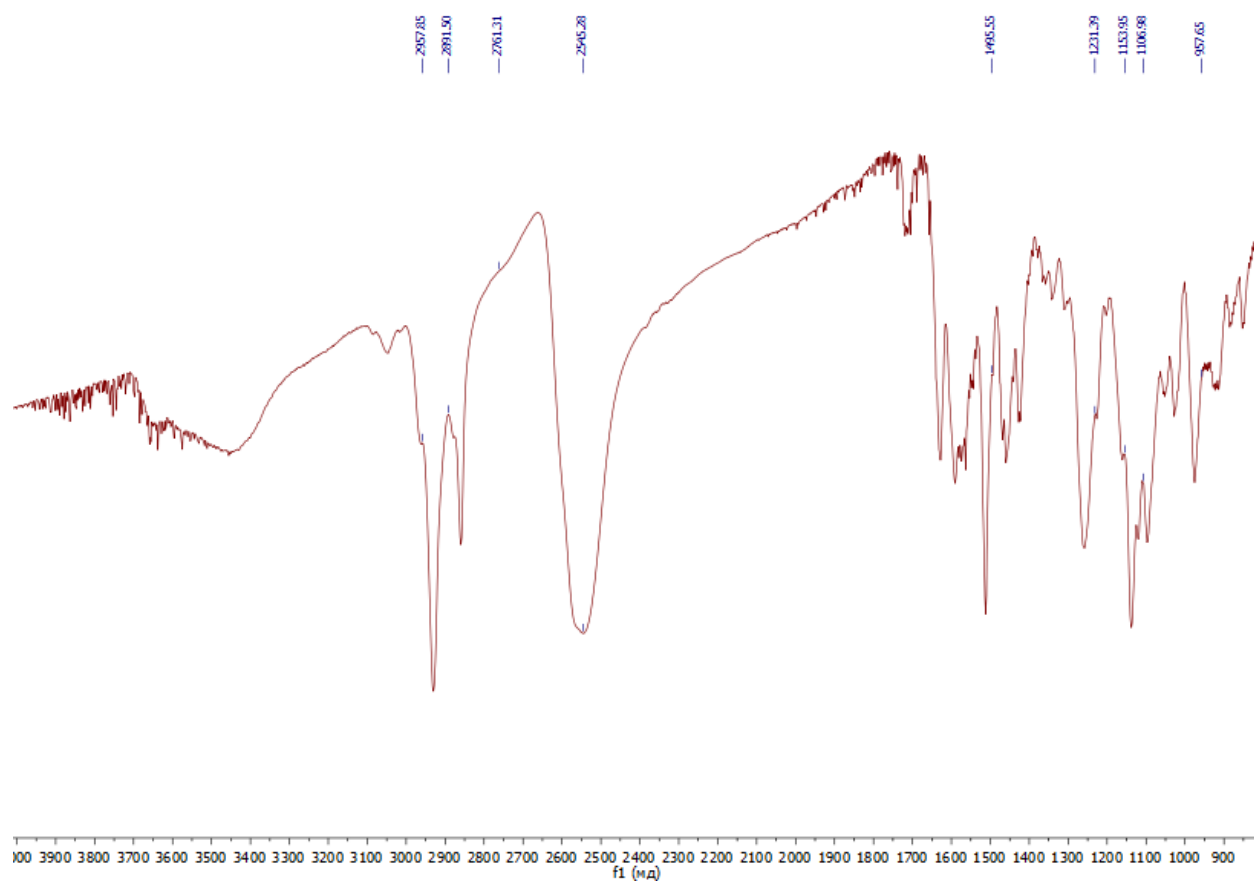

Figure S7. IR spectrum of compound 6

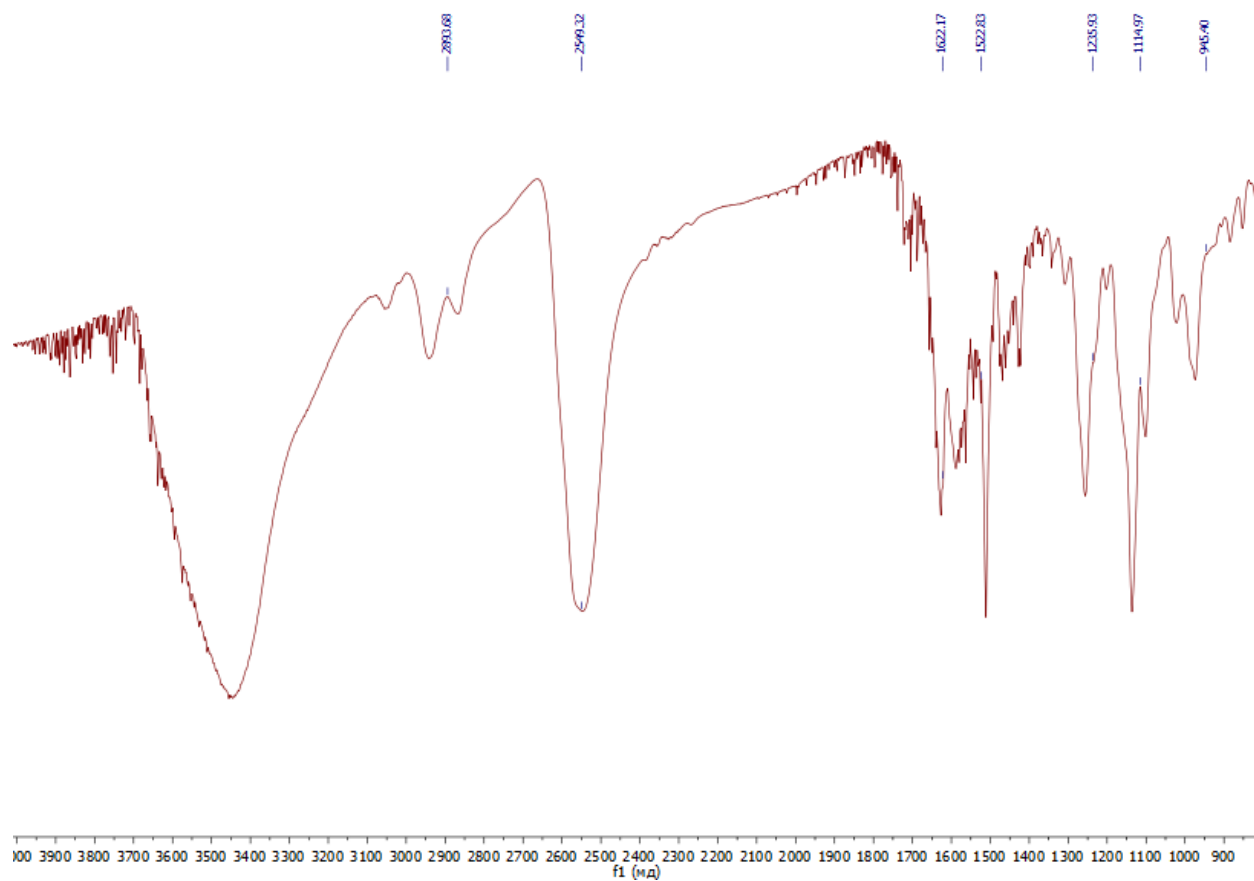

Figure S8. IR spectrum of compound 7

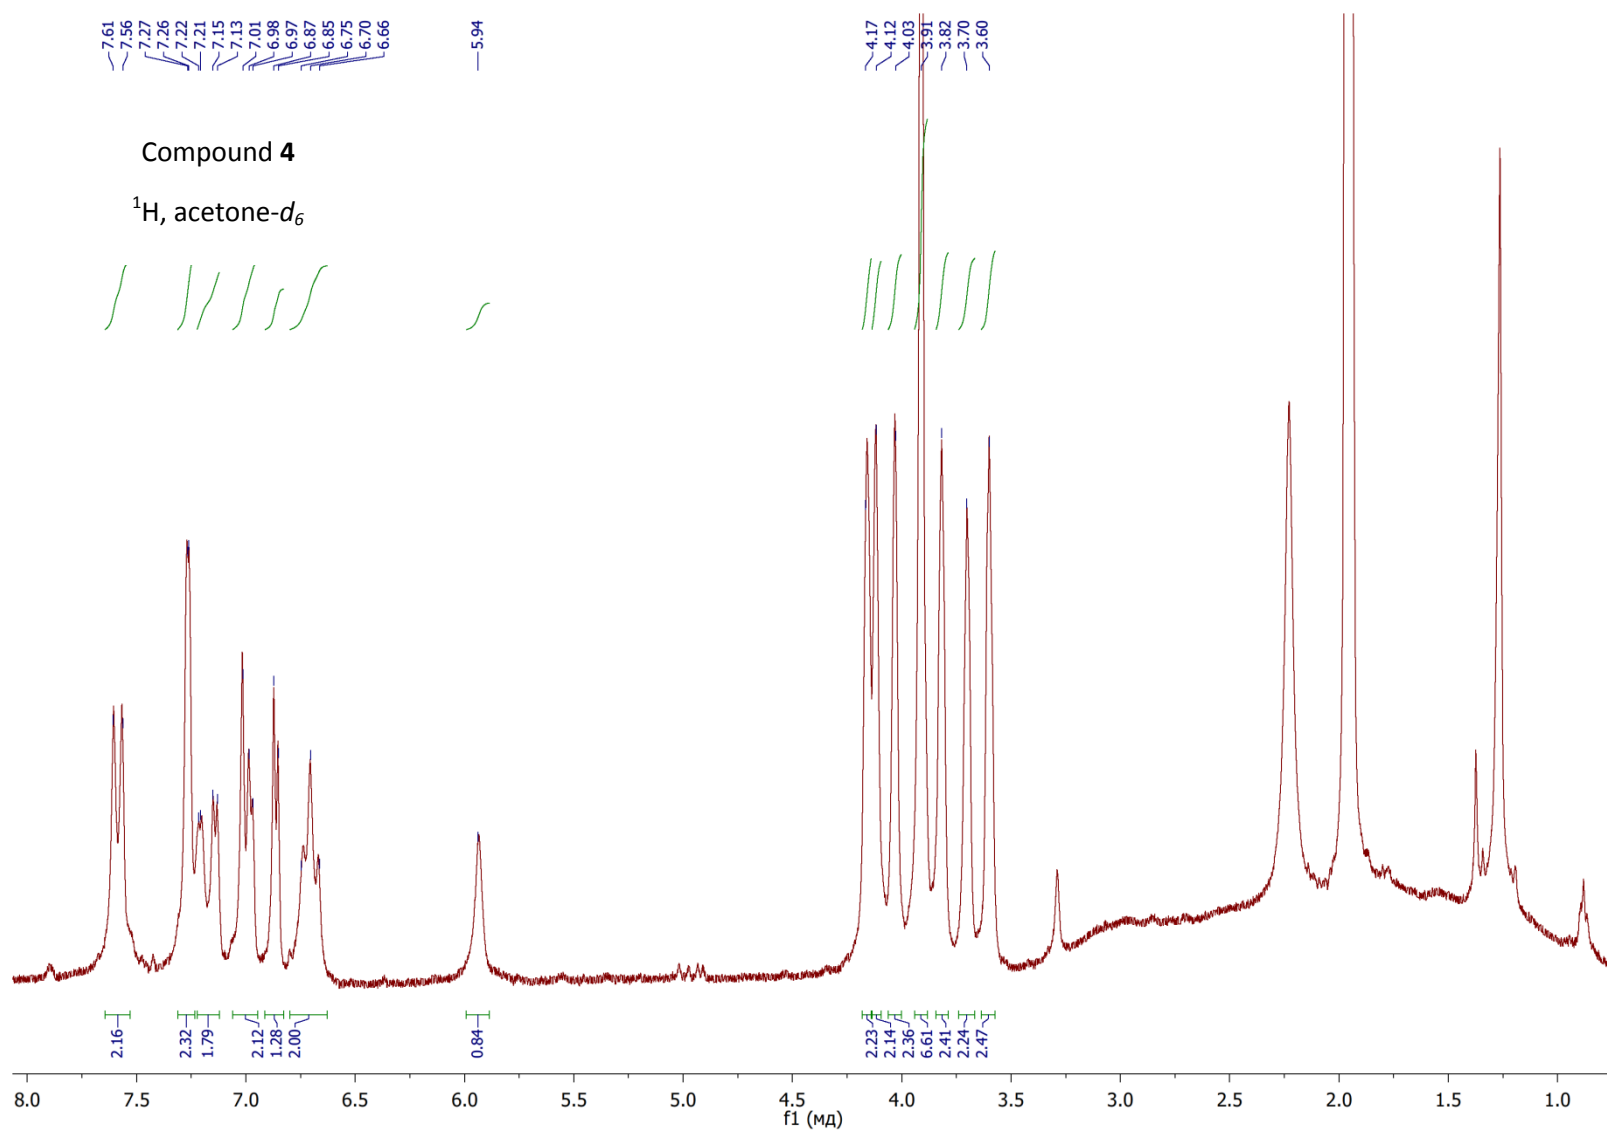

Figure S9.  $^1\text{H}$  NMR spectrum of compound **4**



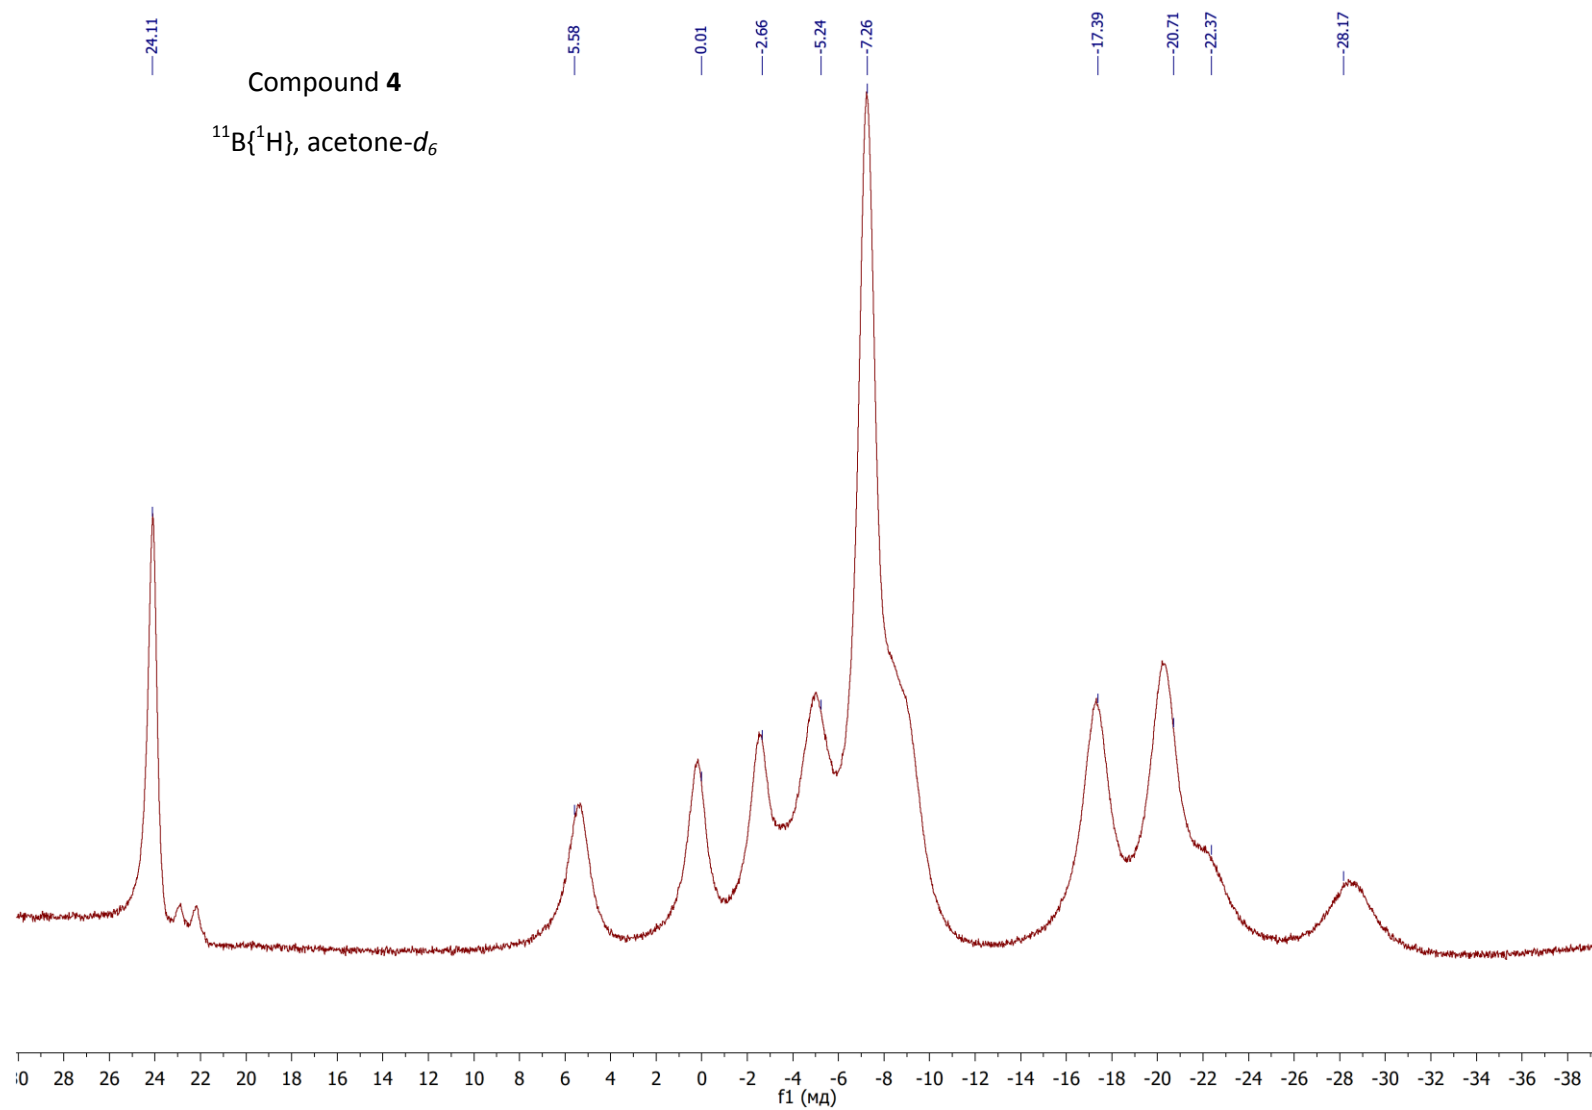

Figure S10.  $^{11}\text{B}\{^1\text{H}\}$  NMR spectrum of compound **4**

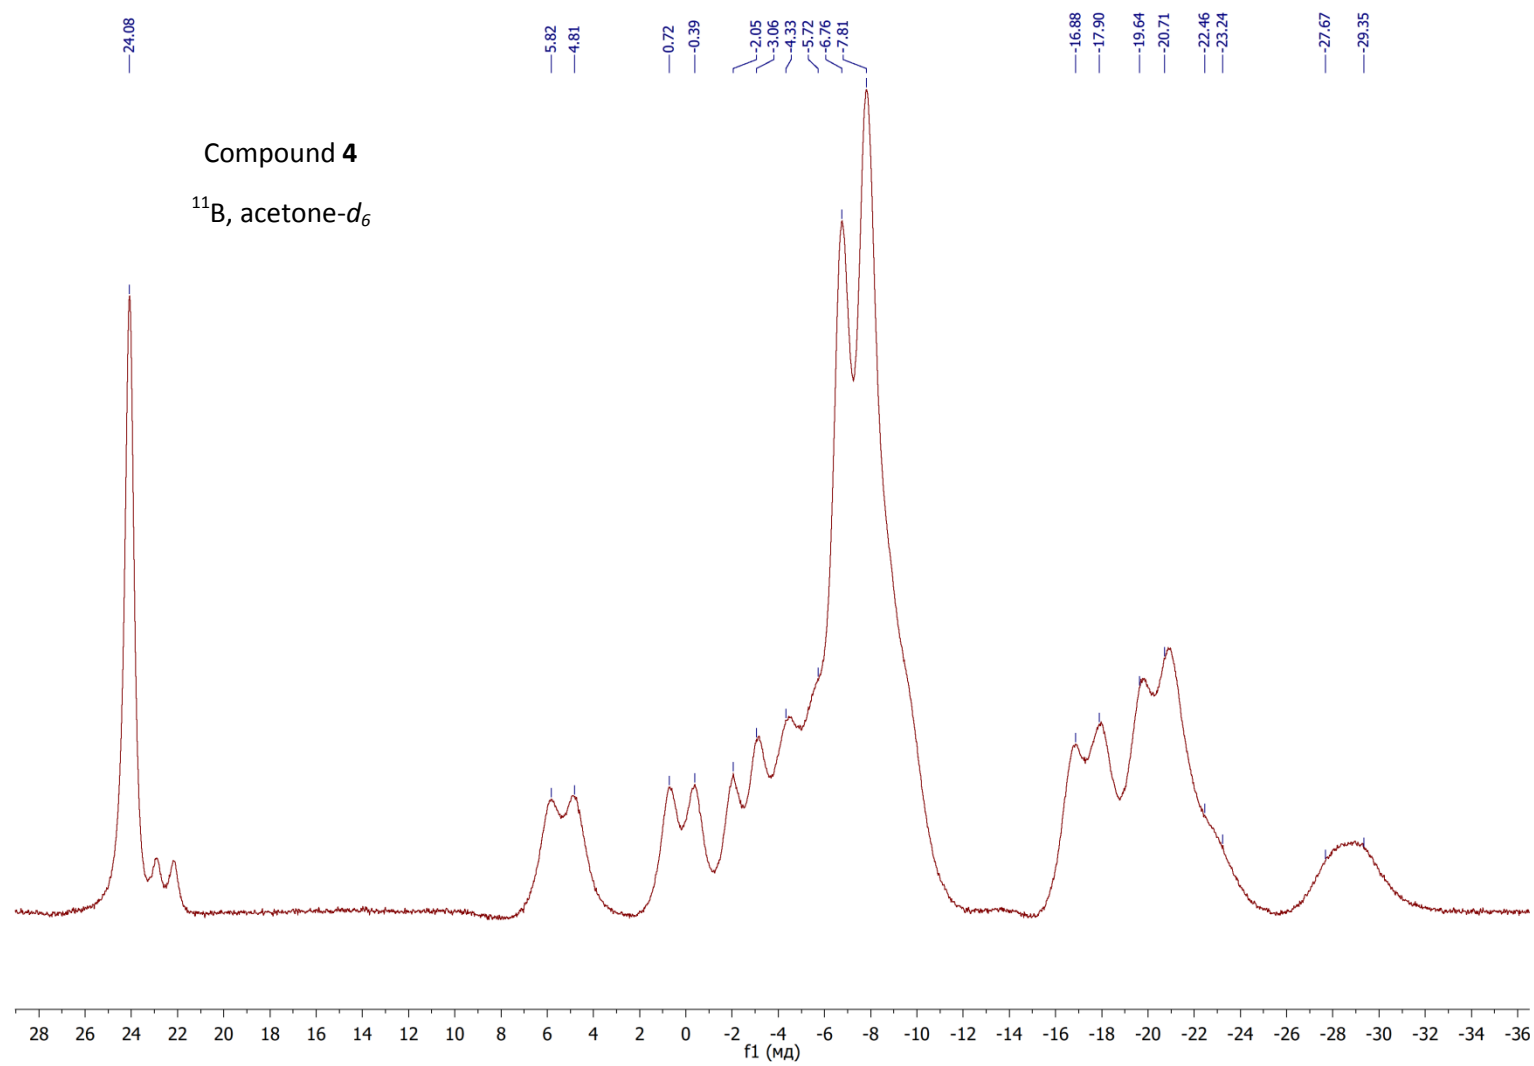

**Figure S11.**  $^{11}\text{B}$  NMR spectrum of compound **4**

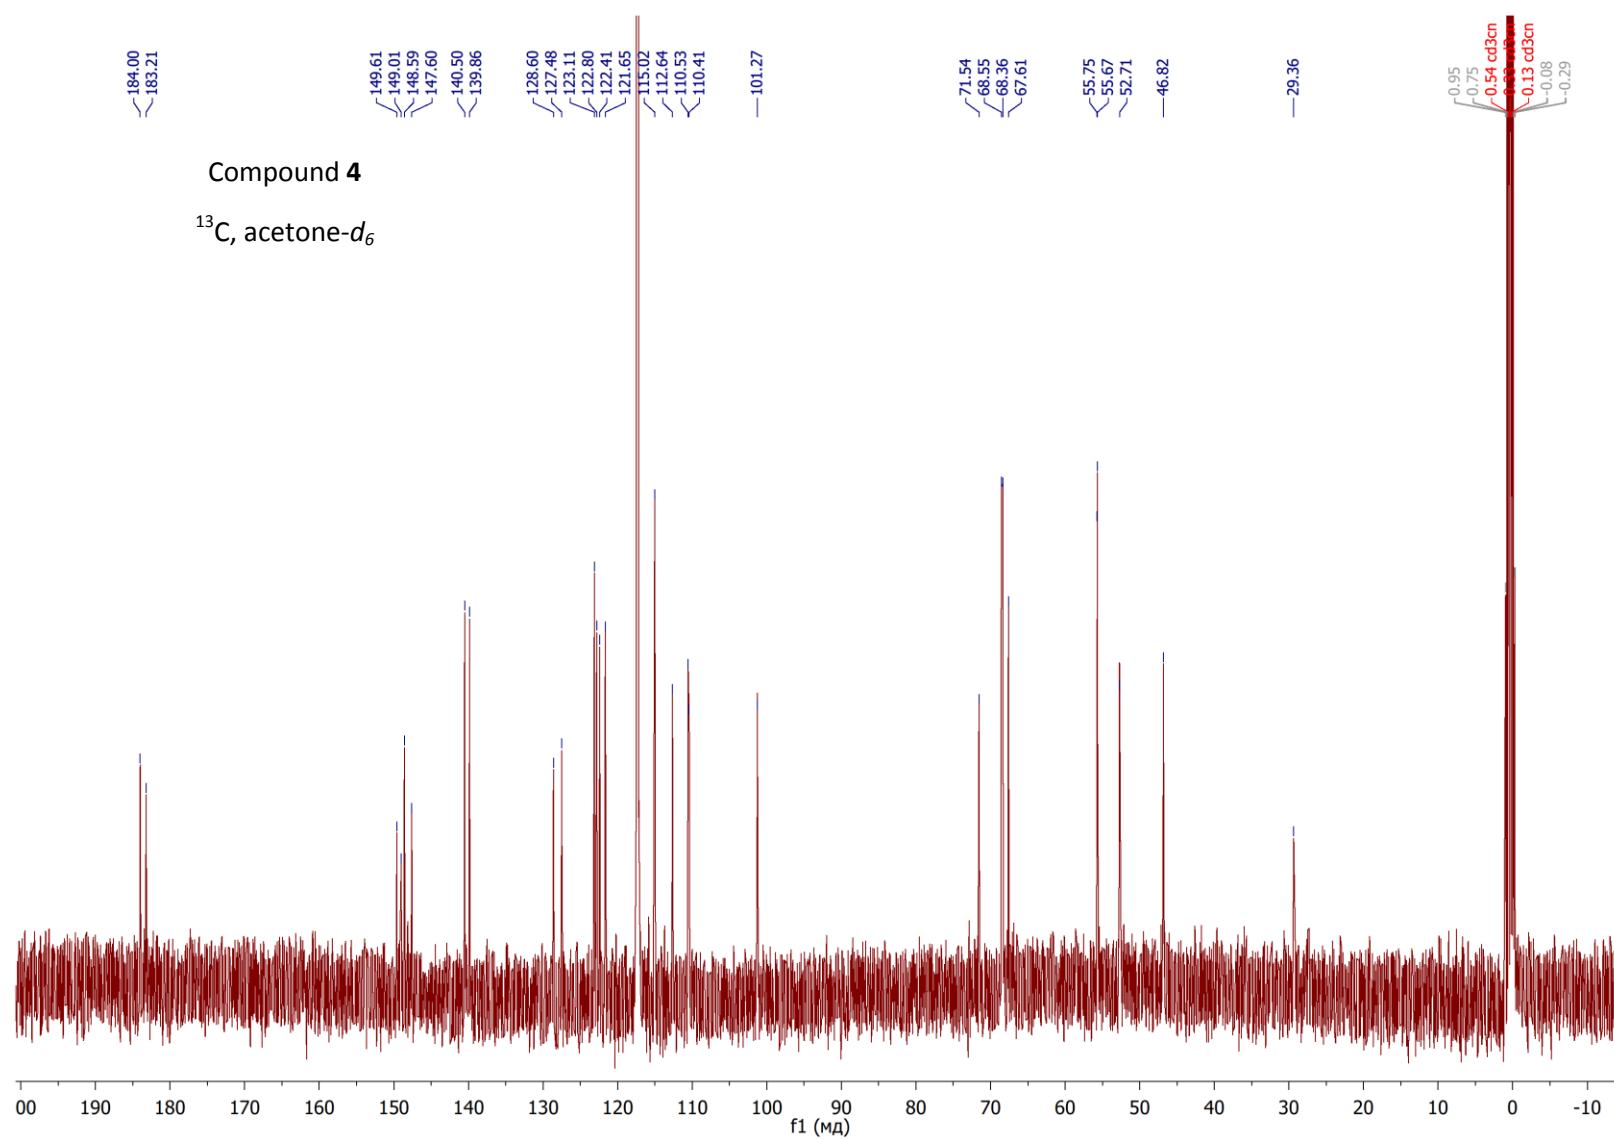

Figure S12.  $^{13}\text{C}$  NMR spectrum of compound **4**

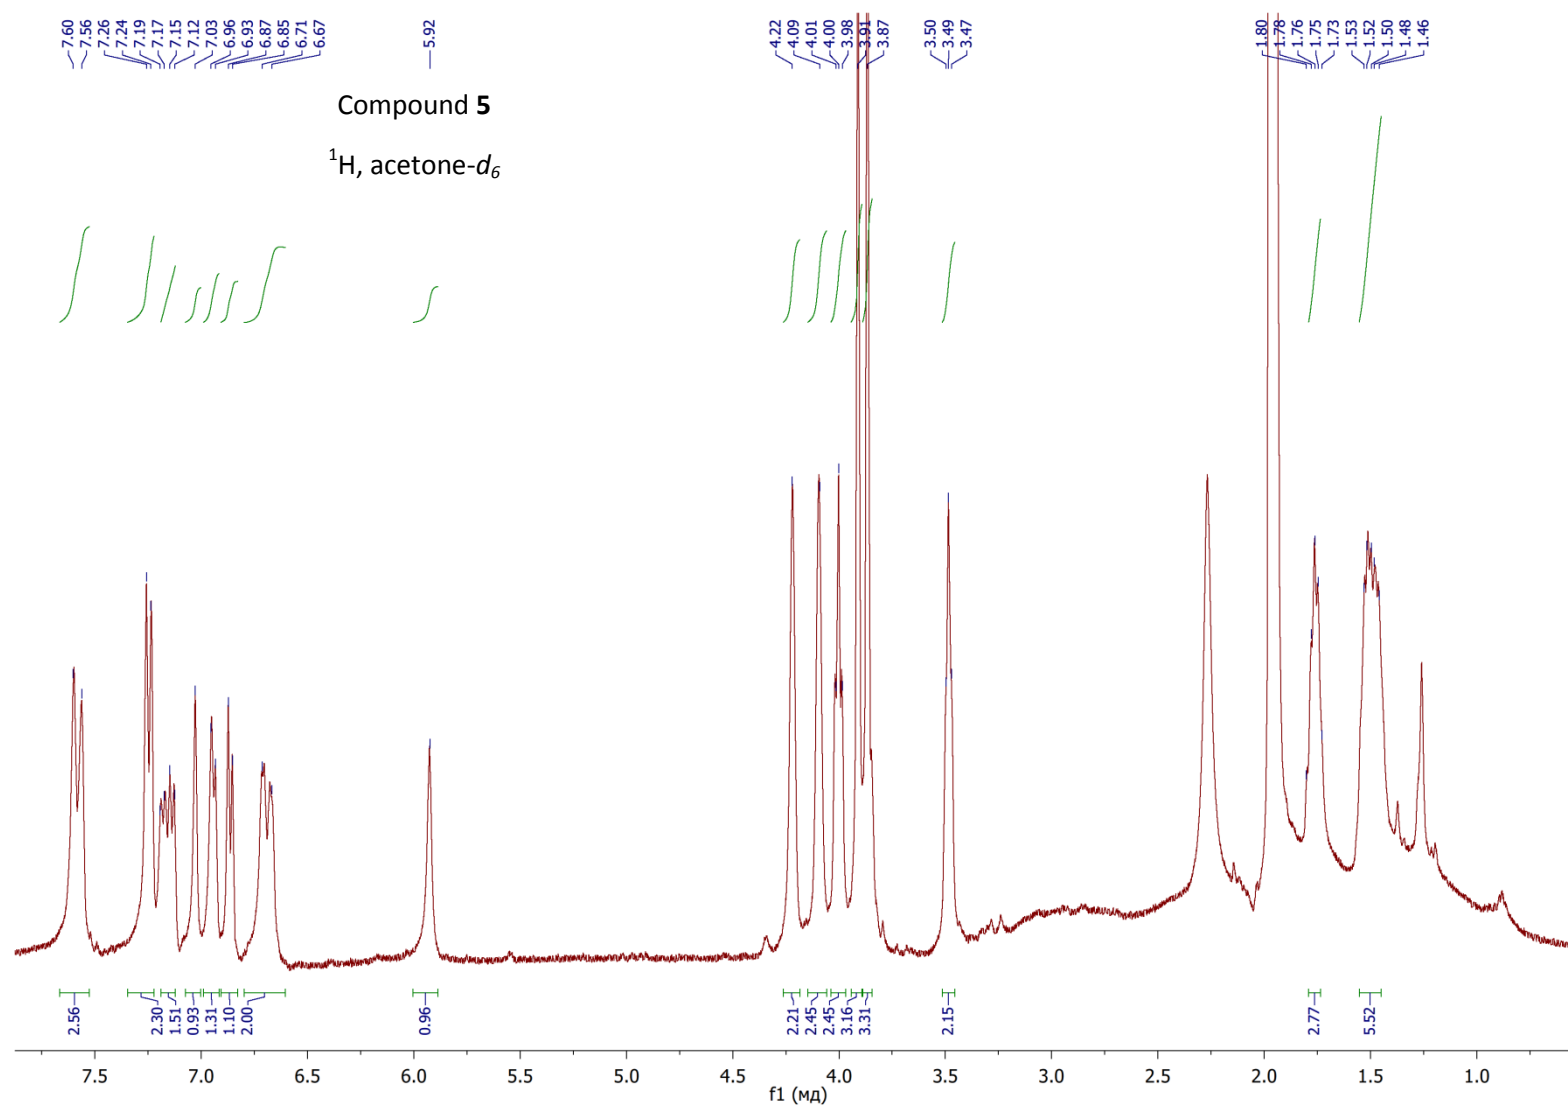

Figure S13.  $^1\text{H}$  NMR spectrum of compound **5**

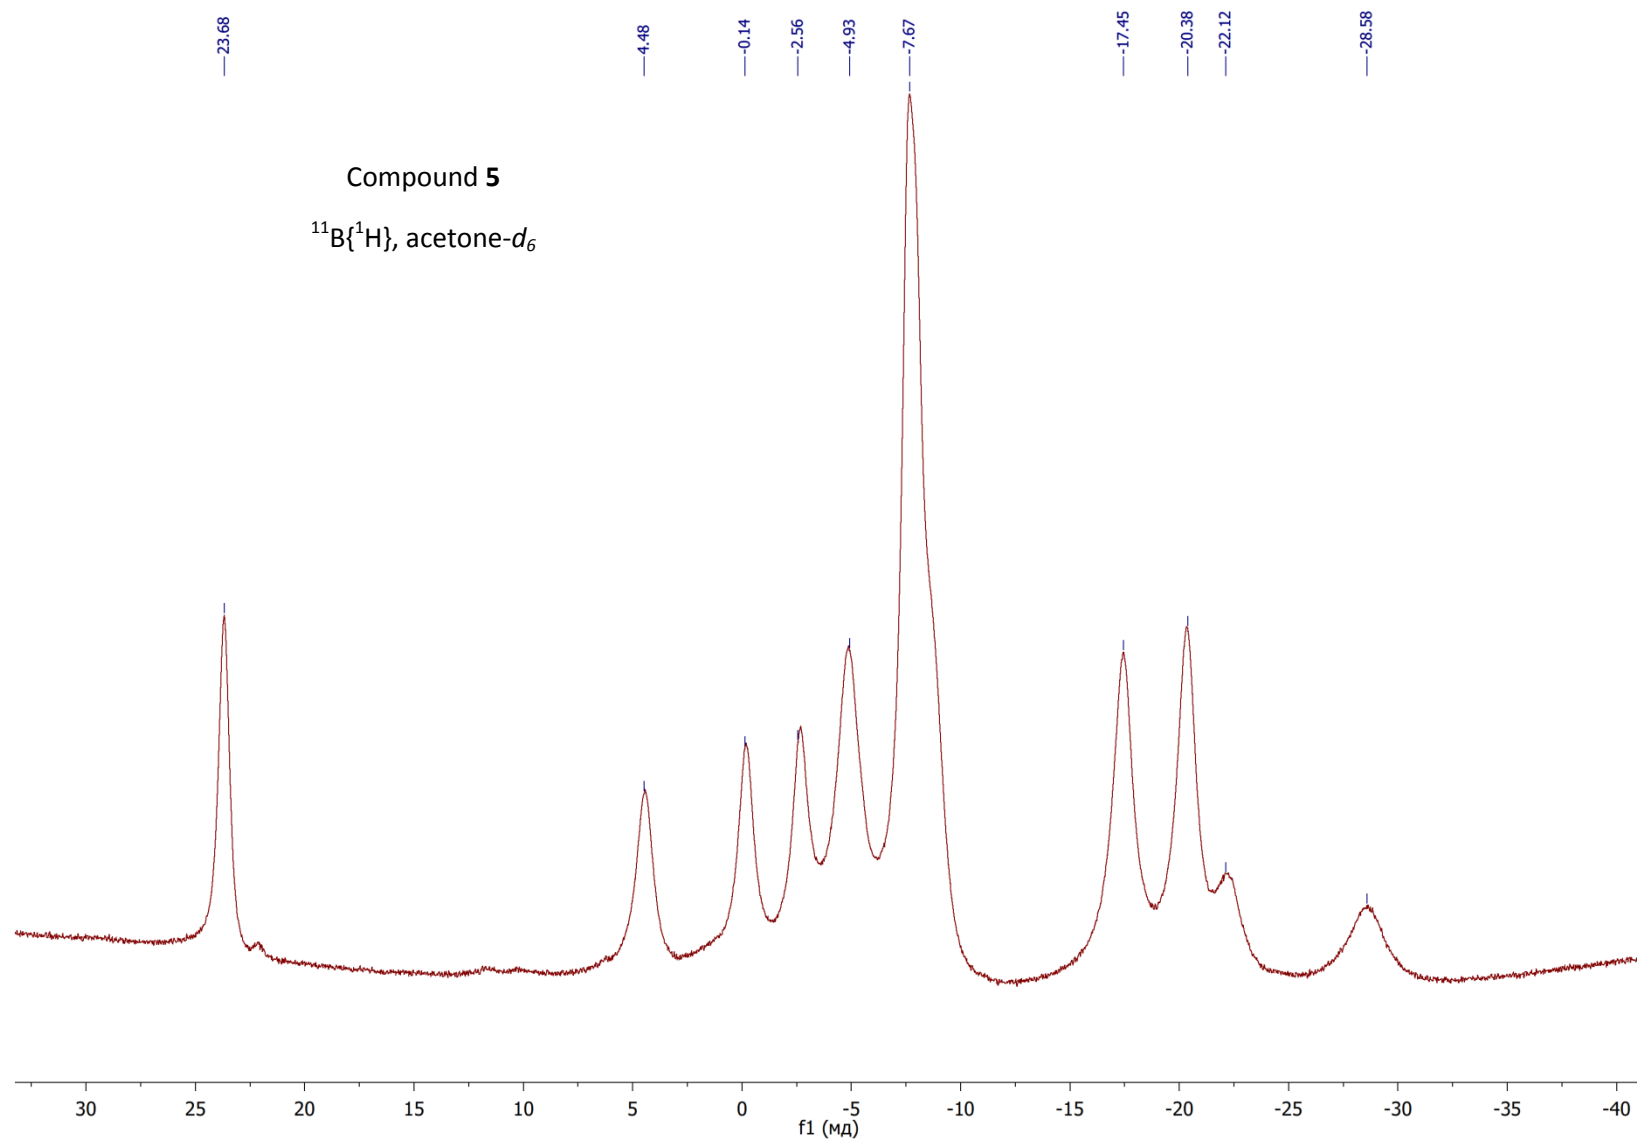

Figure S14.  $^{11}\text{B}\{^1\text{H}\}$  NMR spectrum of compound **5**

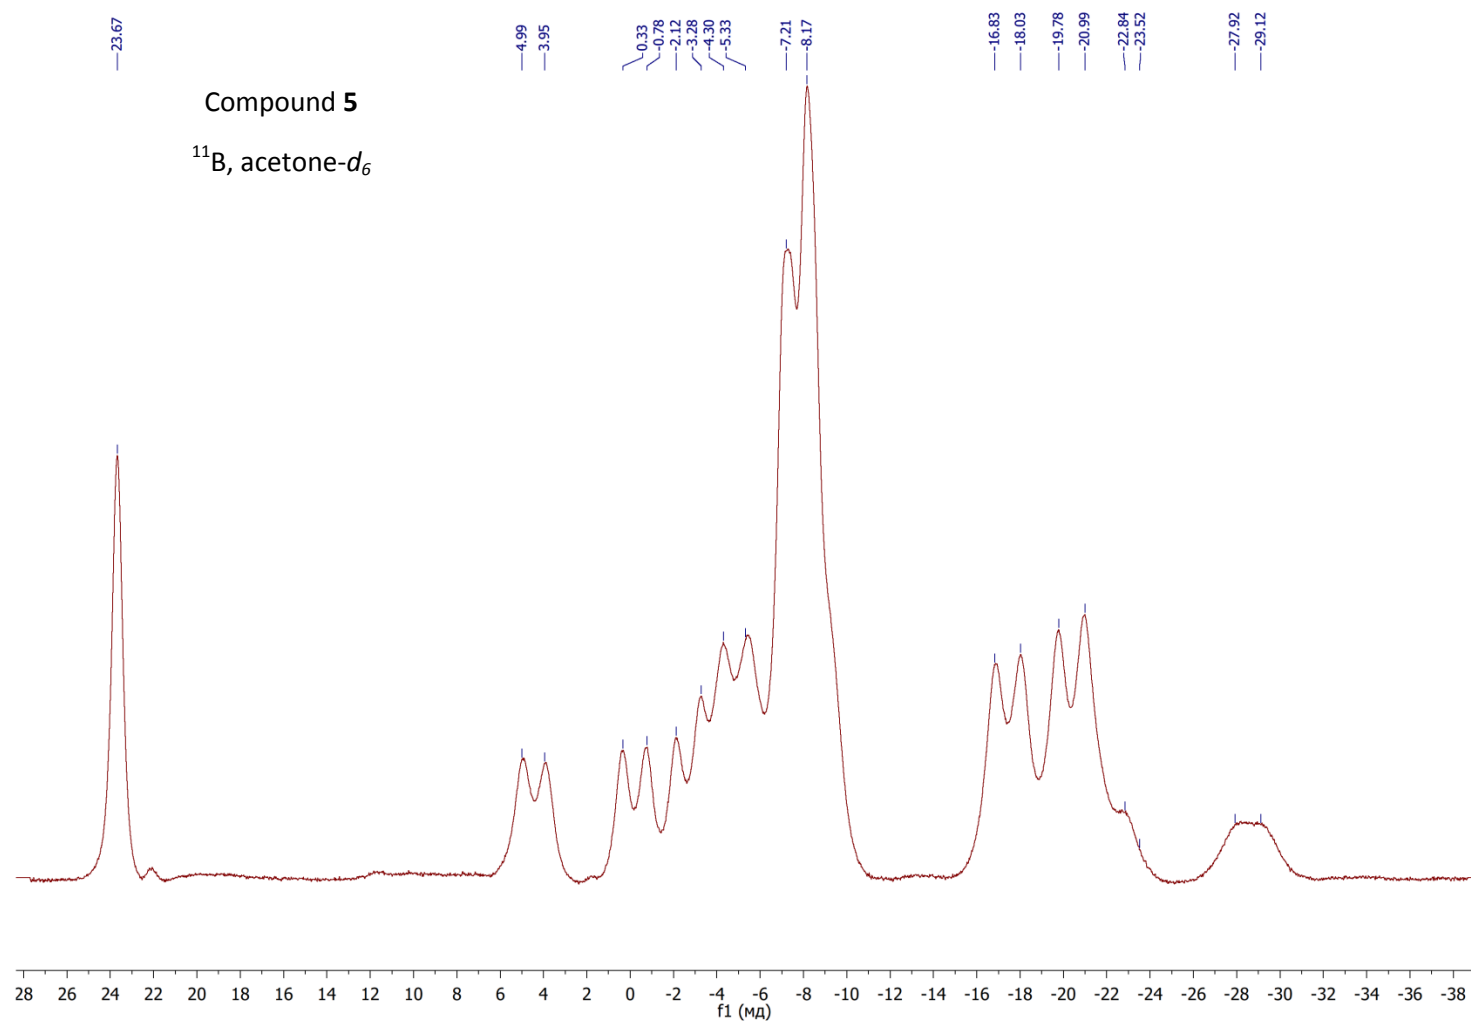

Figure S15.  $^{11}\text{B}$  NMR spectrum of compound 5

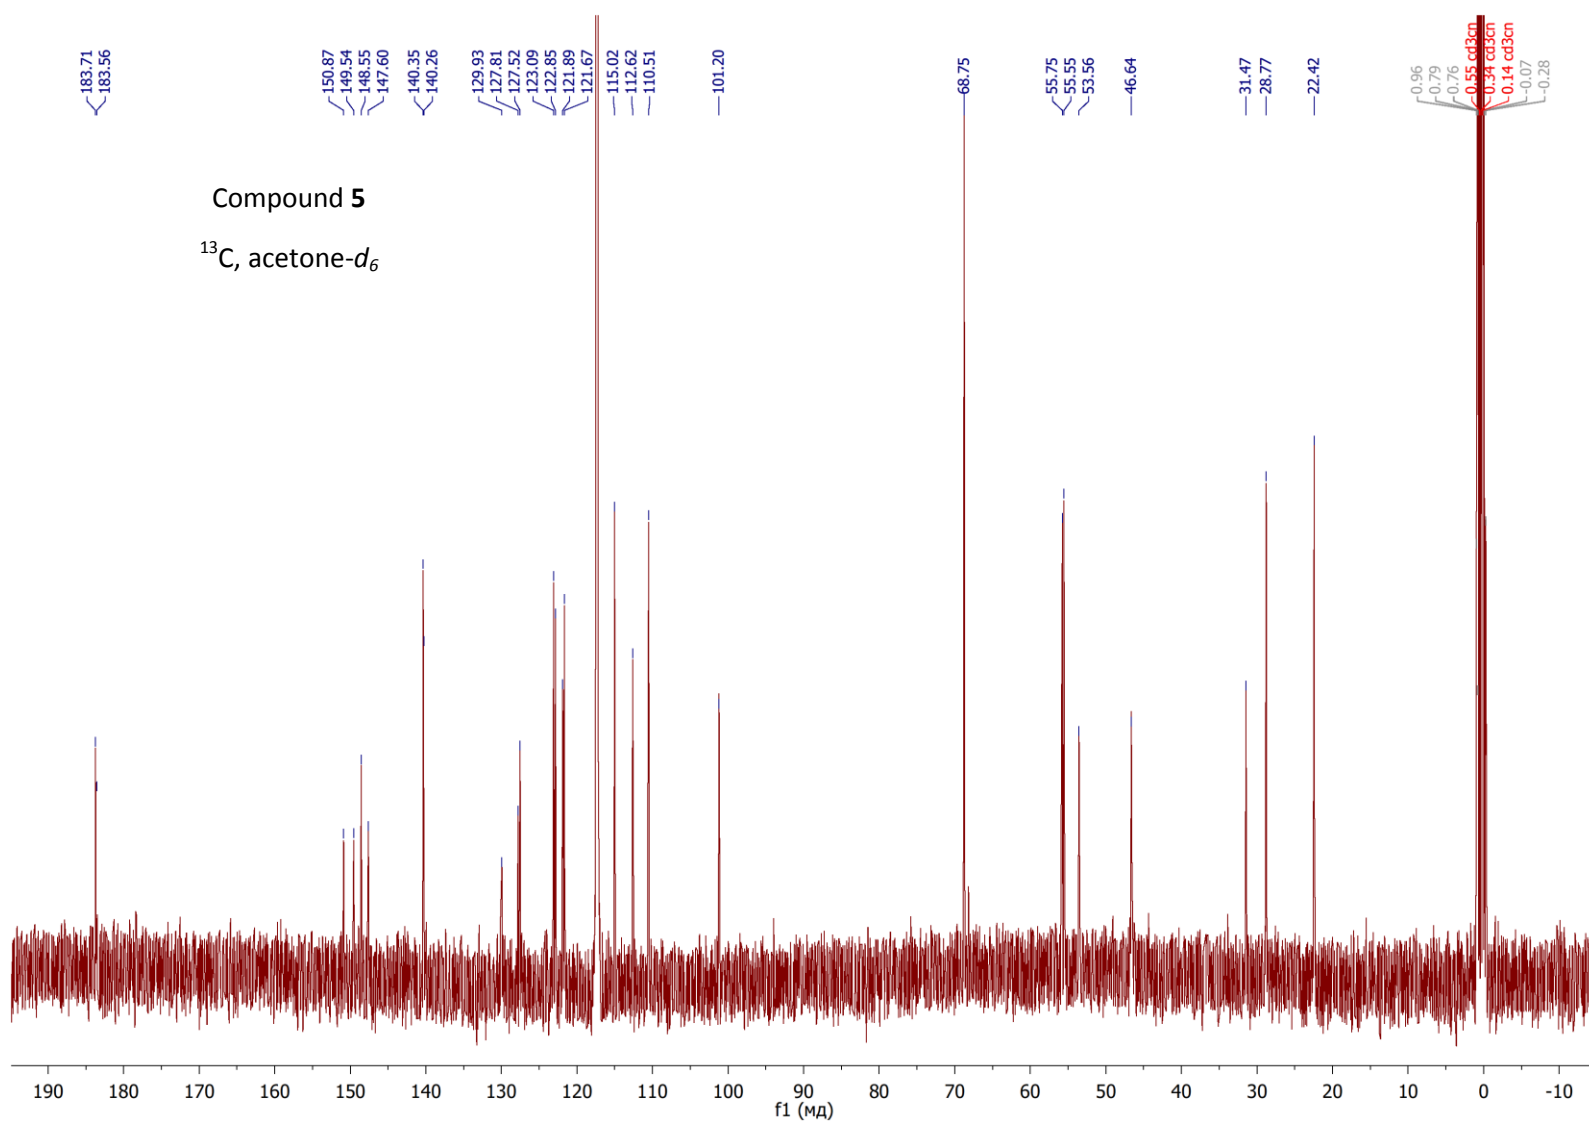

Figure S16.  $^{13}\text{C}$  NMR spectrum of compound 5

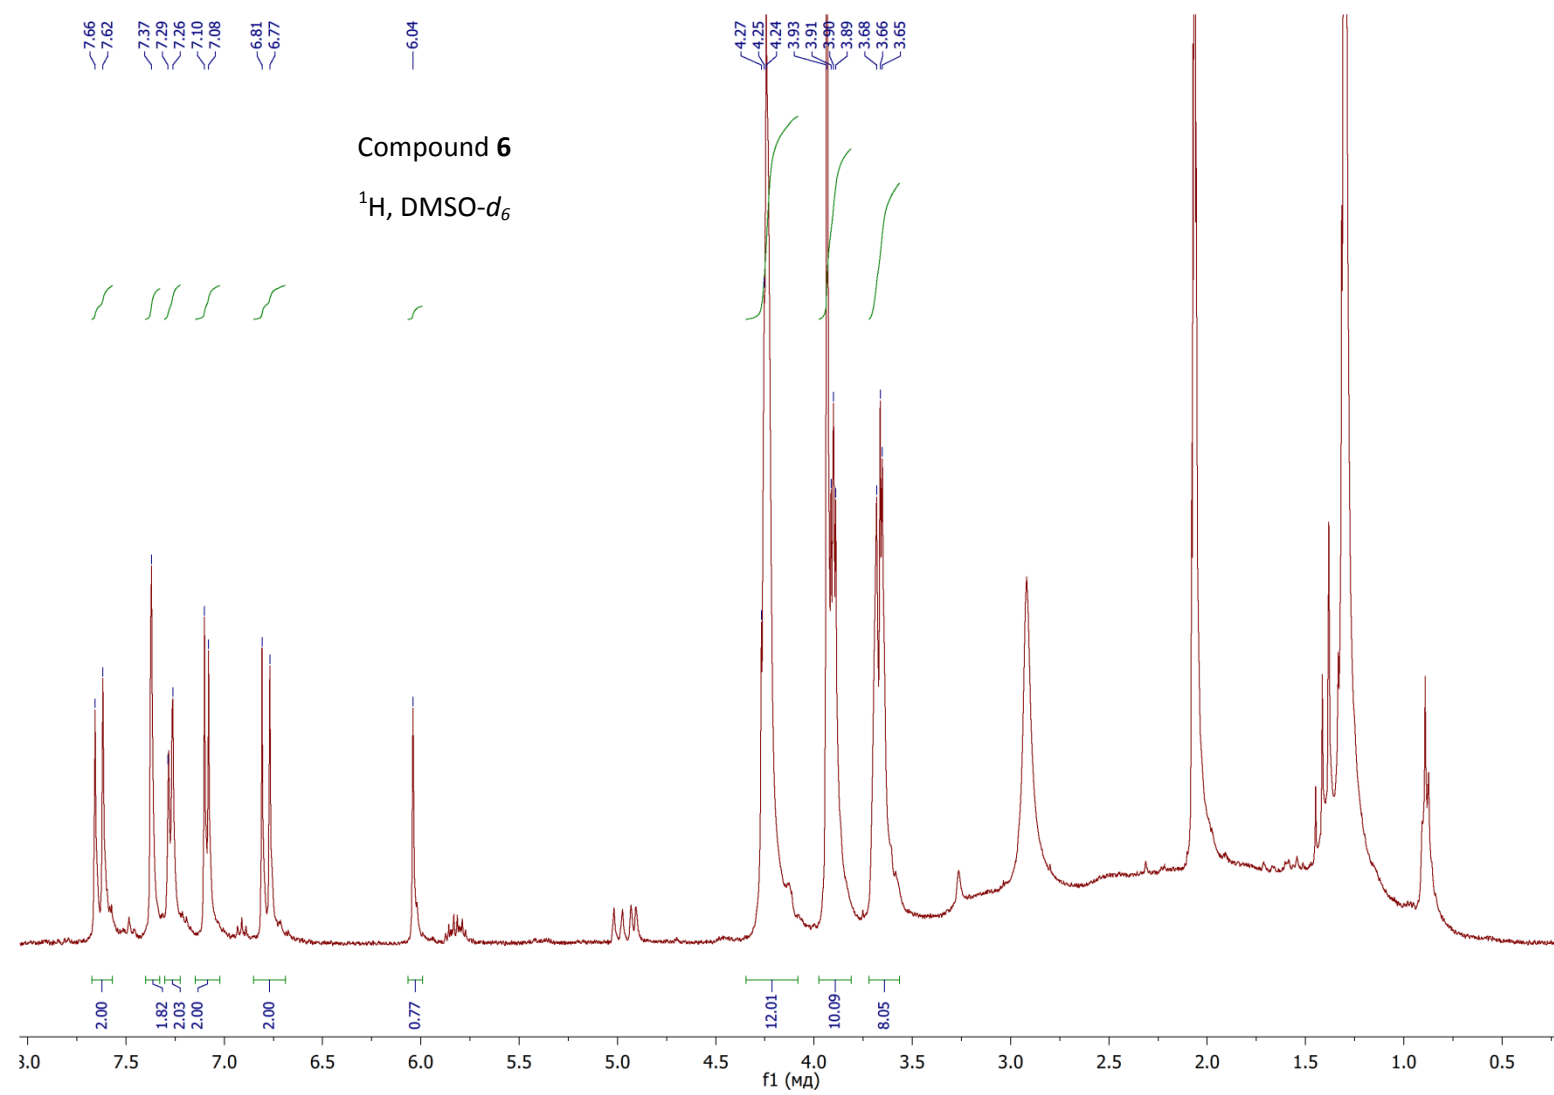

Figure S17.  $^1\text{H}$  NMR spectrum of compound **6**



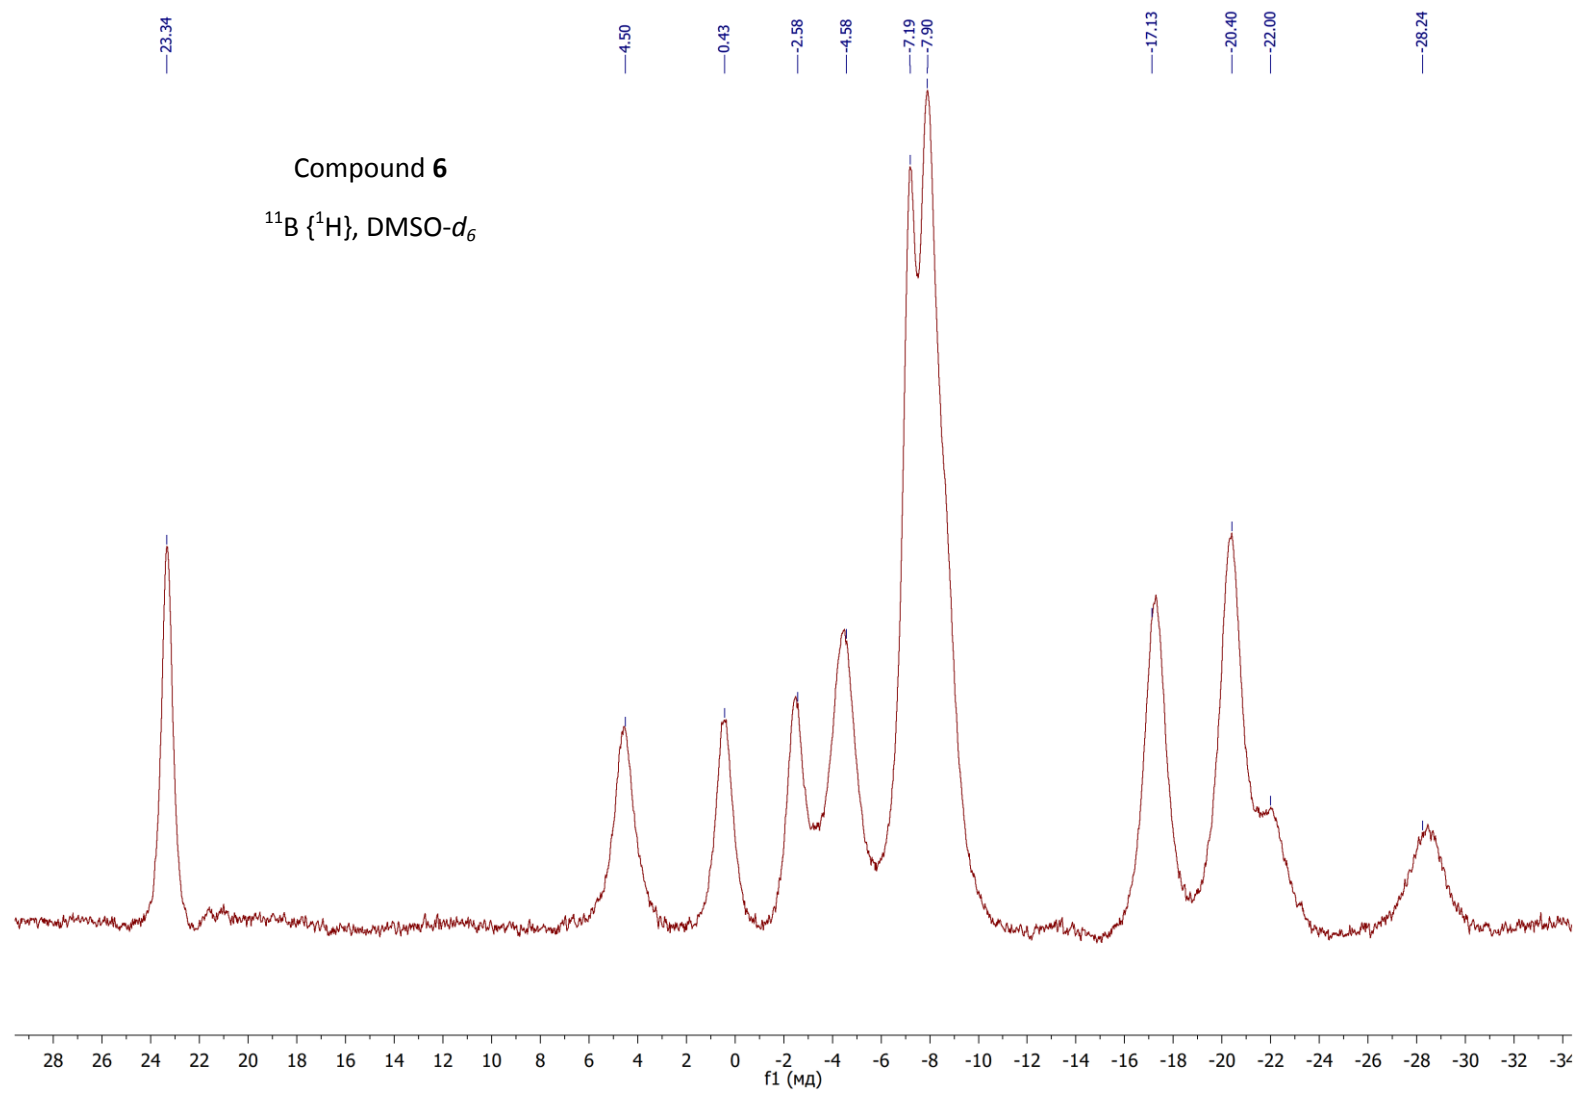

Figure S18.  $^{11}\text{B}\{^1\text{H}\}$  NMR spectrum of compound 6

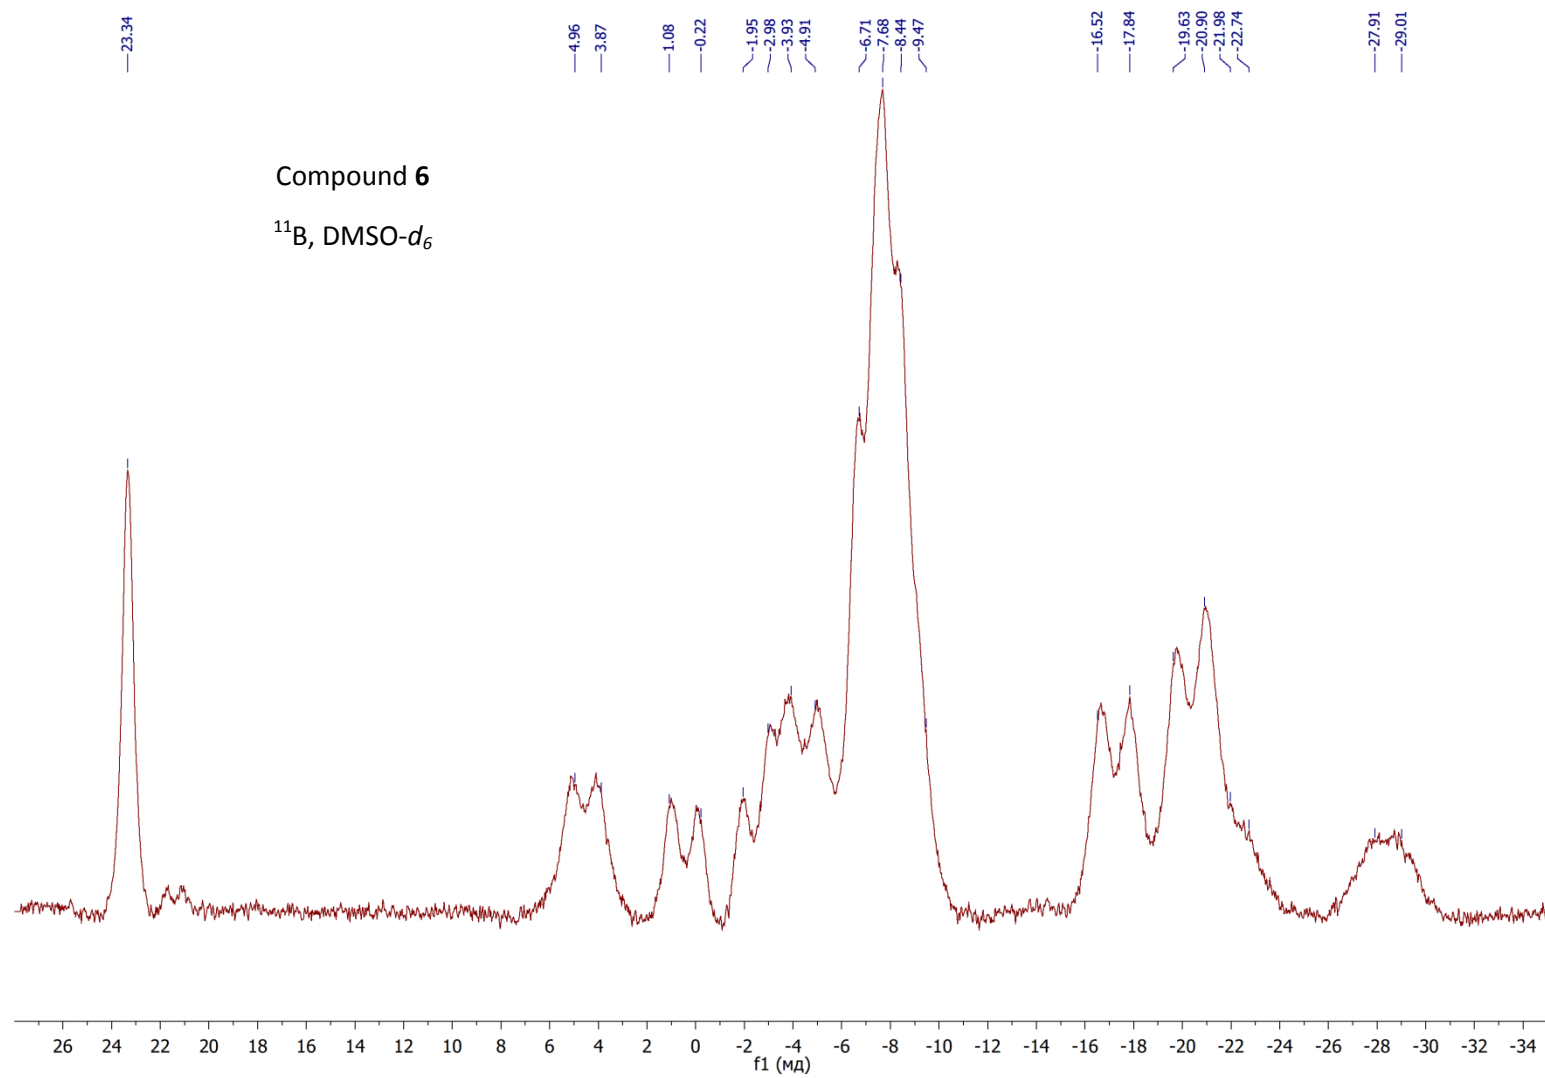

Figure S19.  $^{11}\text{B}$  NMR spectrum of compound **6**

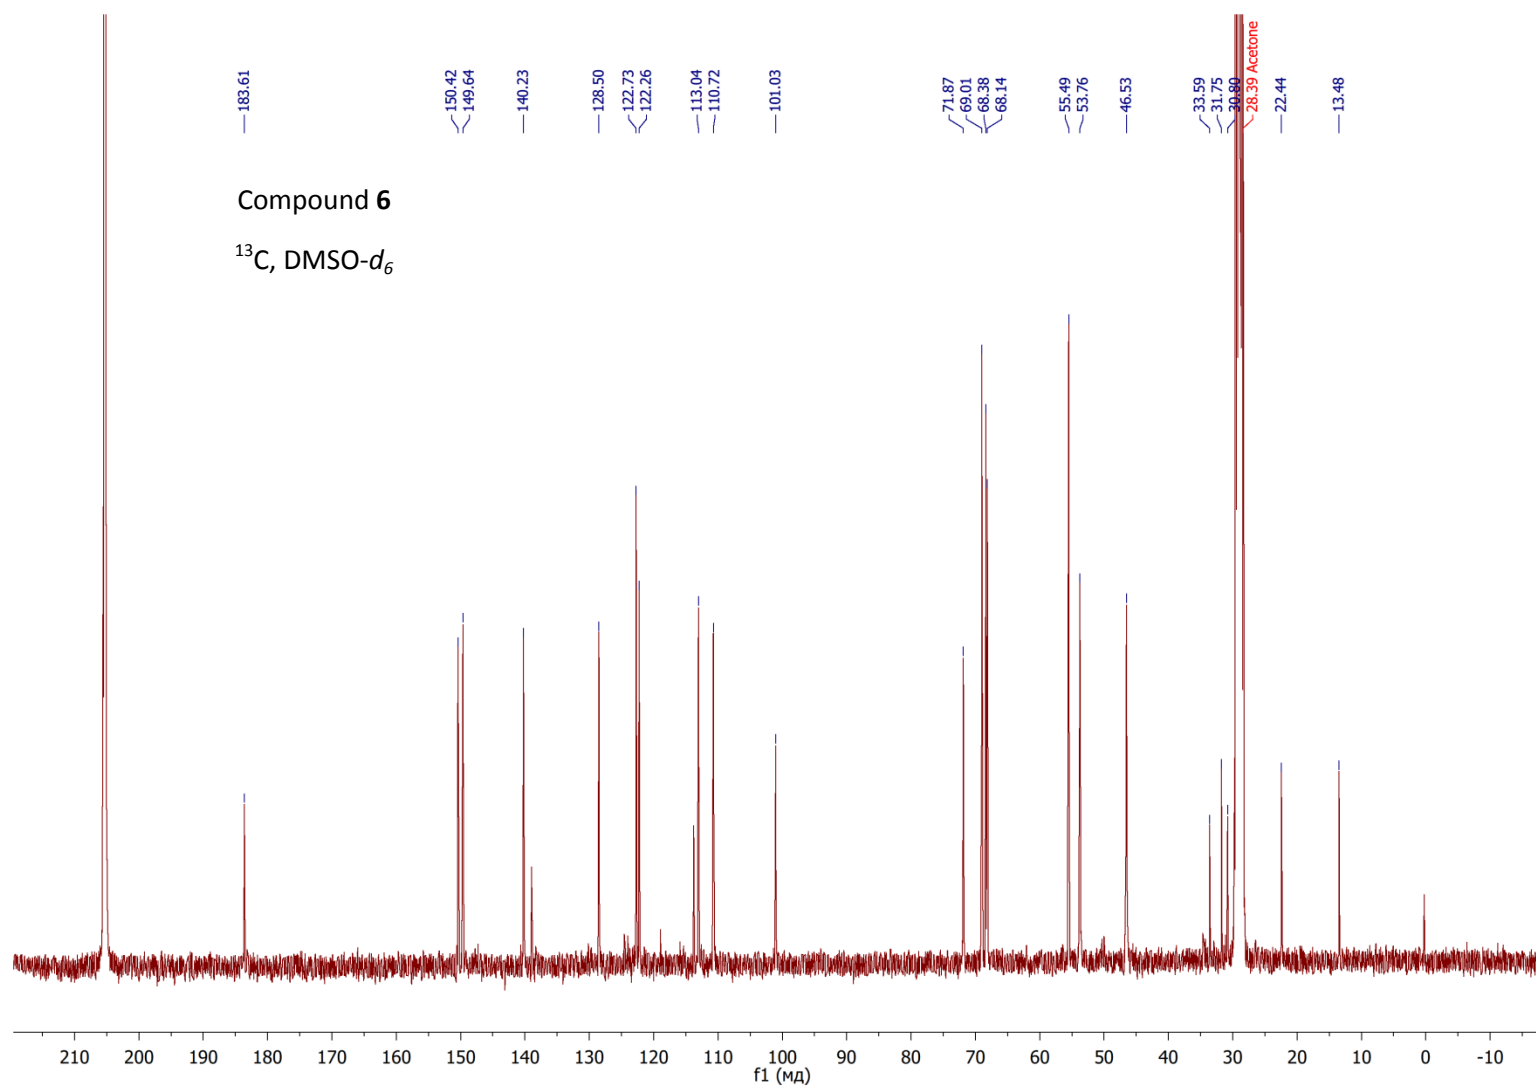

Figure S20.  $^{13}\text{C}$  NMR spectrum of compound **6**

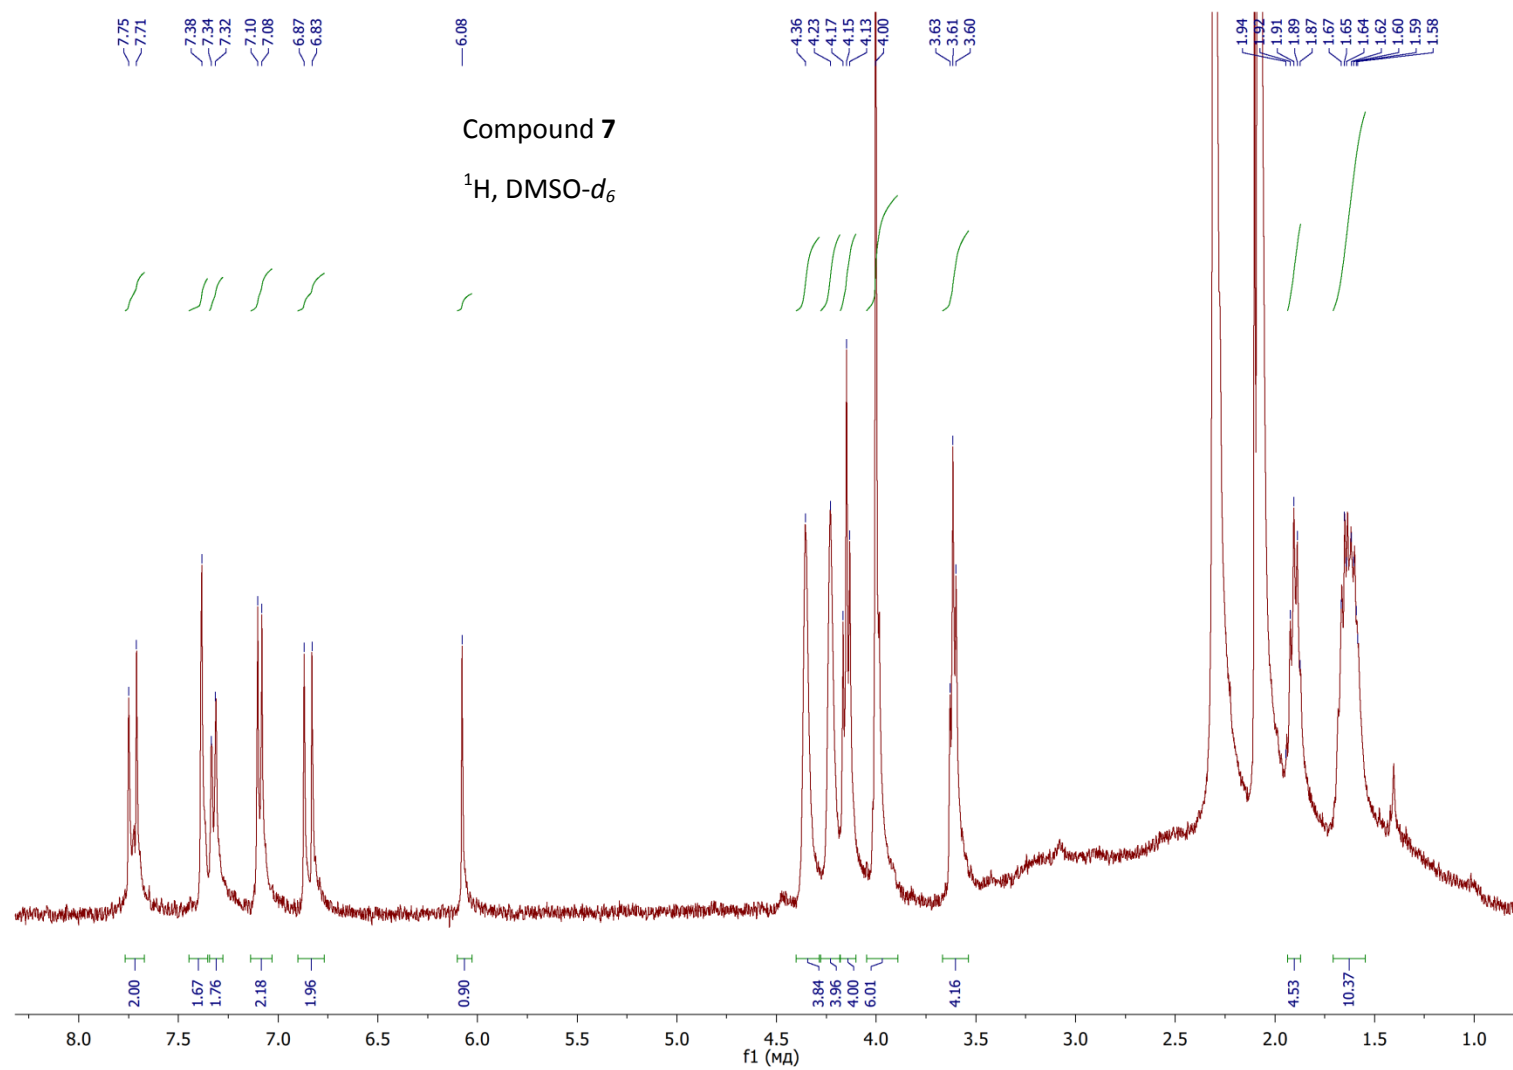

Figure S21.  $^1\text{H}$  NMR spectrum of compound **7**

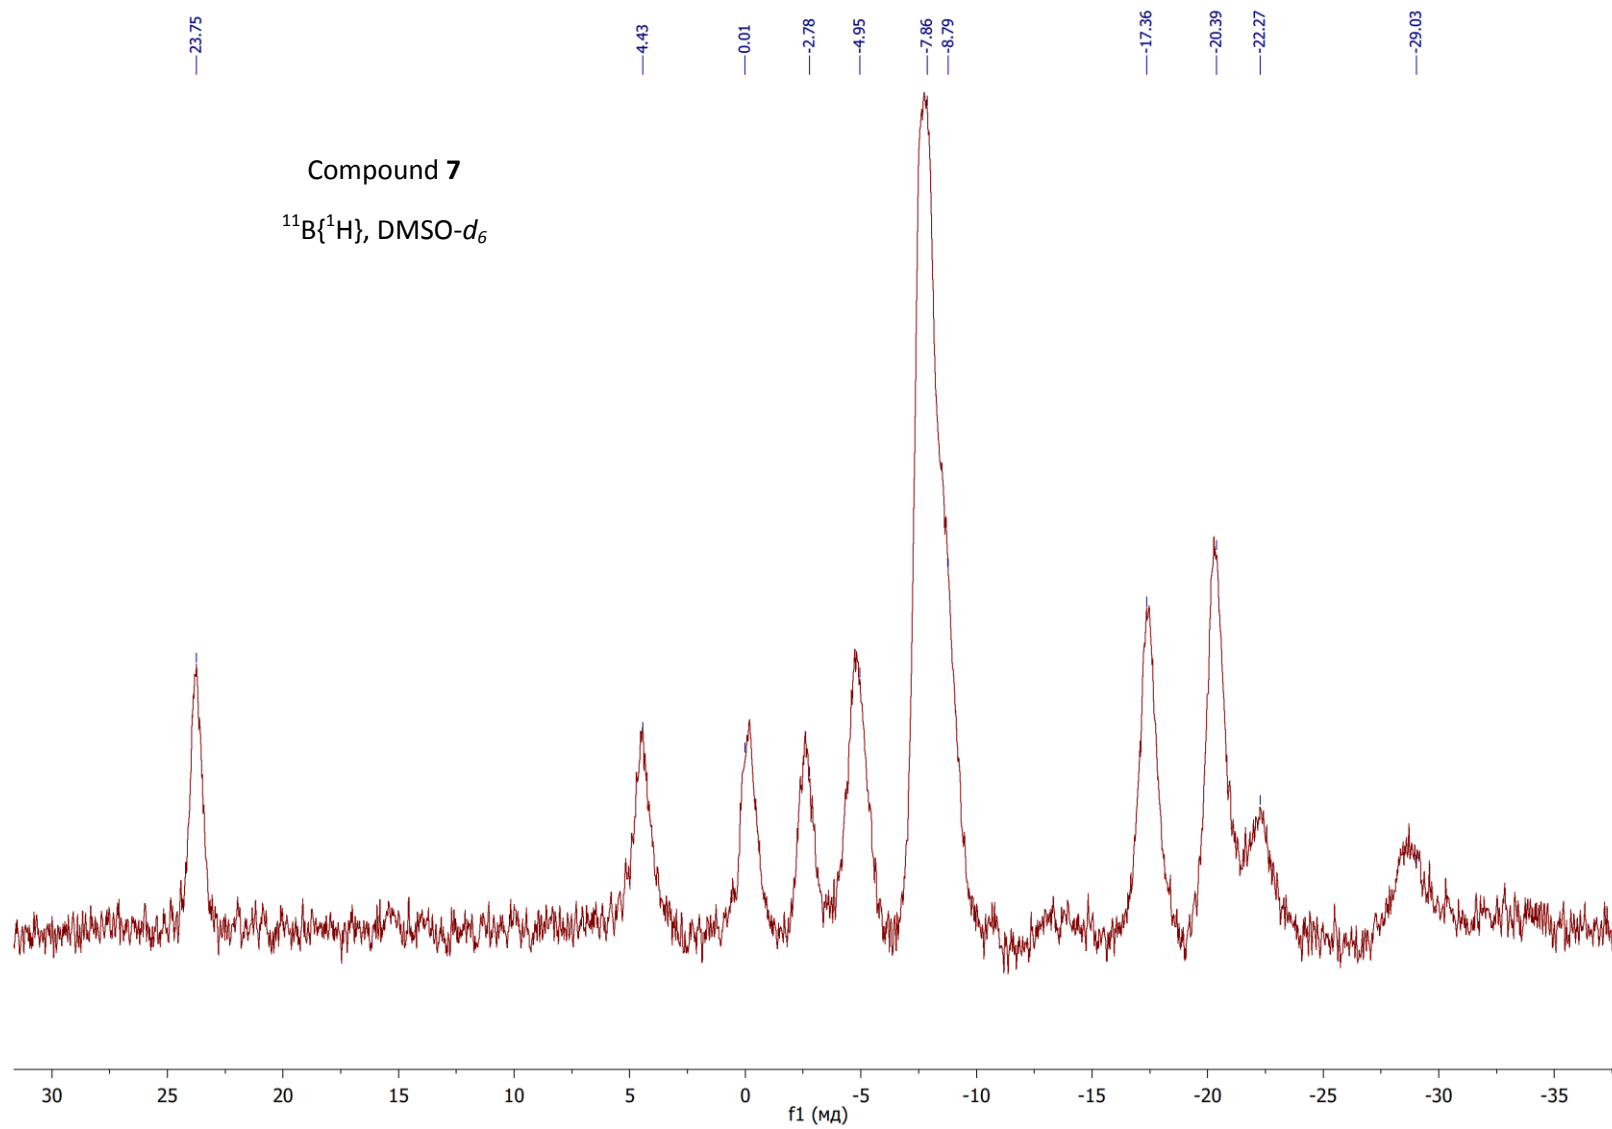

Figure S22.  $^{11}\text{B}\{^1\text{H}\}$  NMR spectrum of compound 7

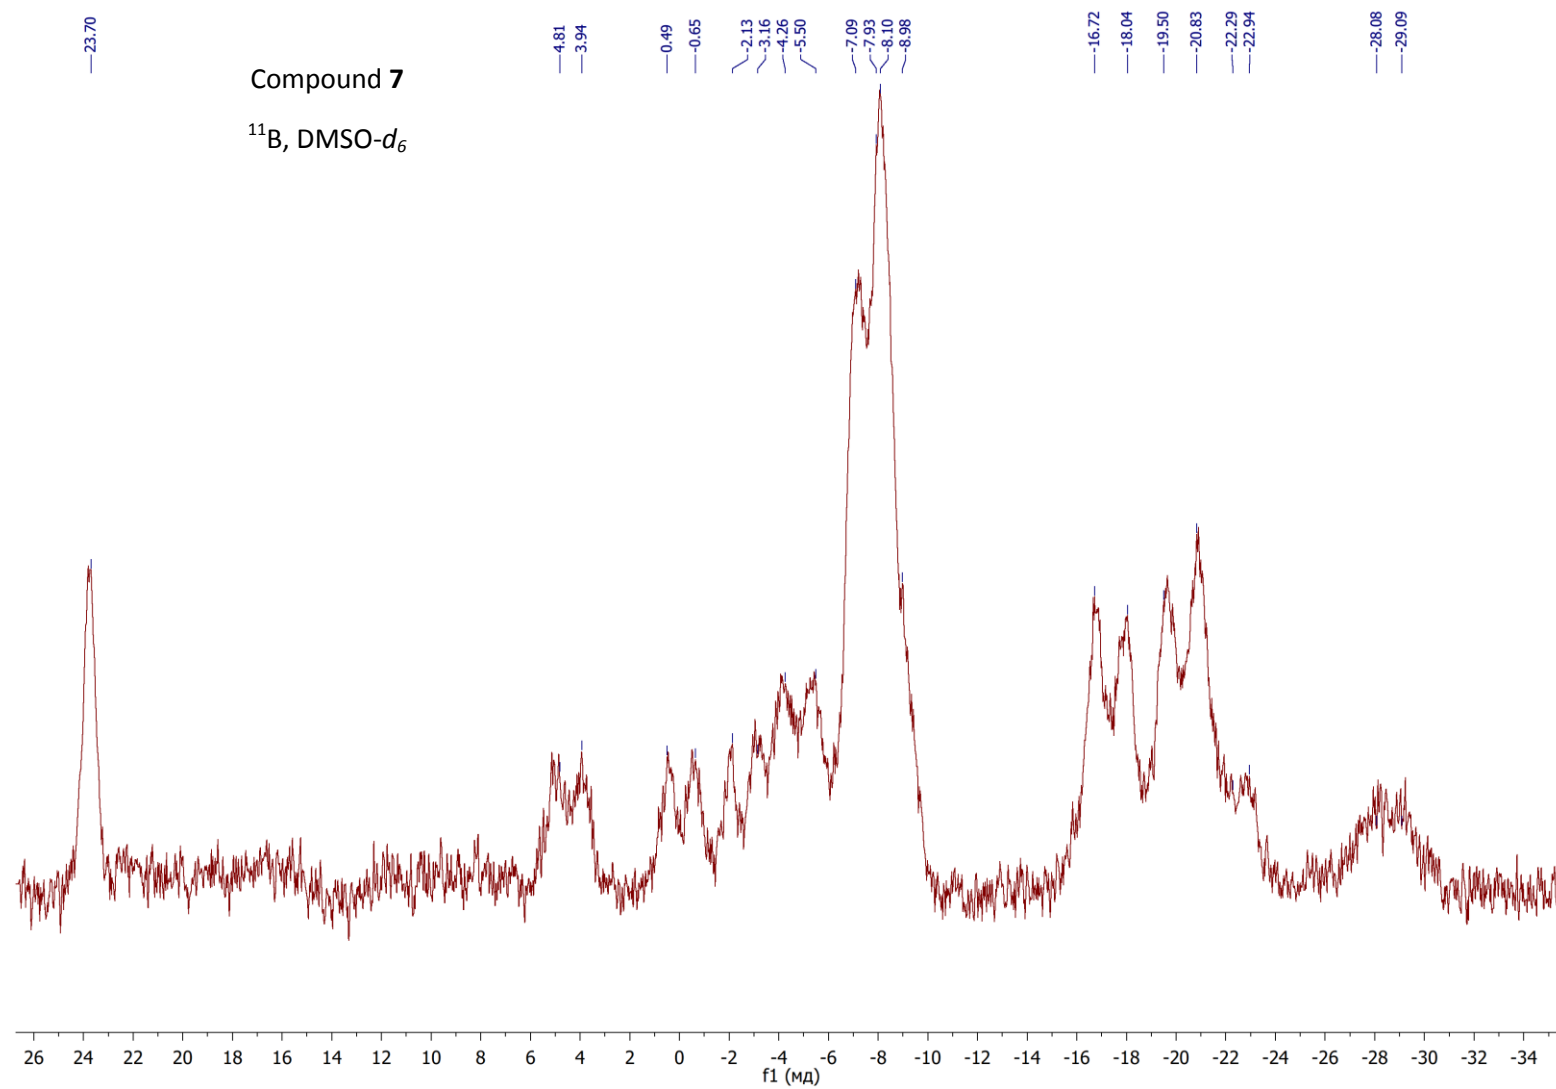

Figure S23.  $^{11}\text{B}$  NMR spectrum of compound **7**

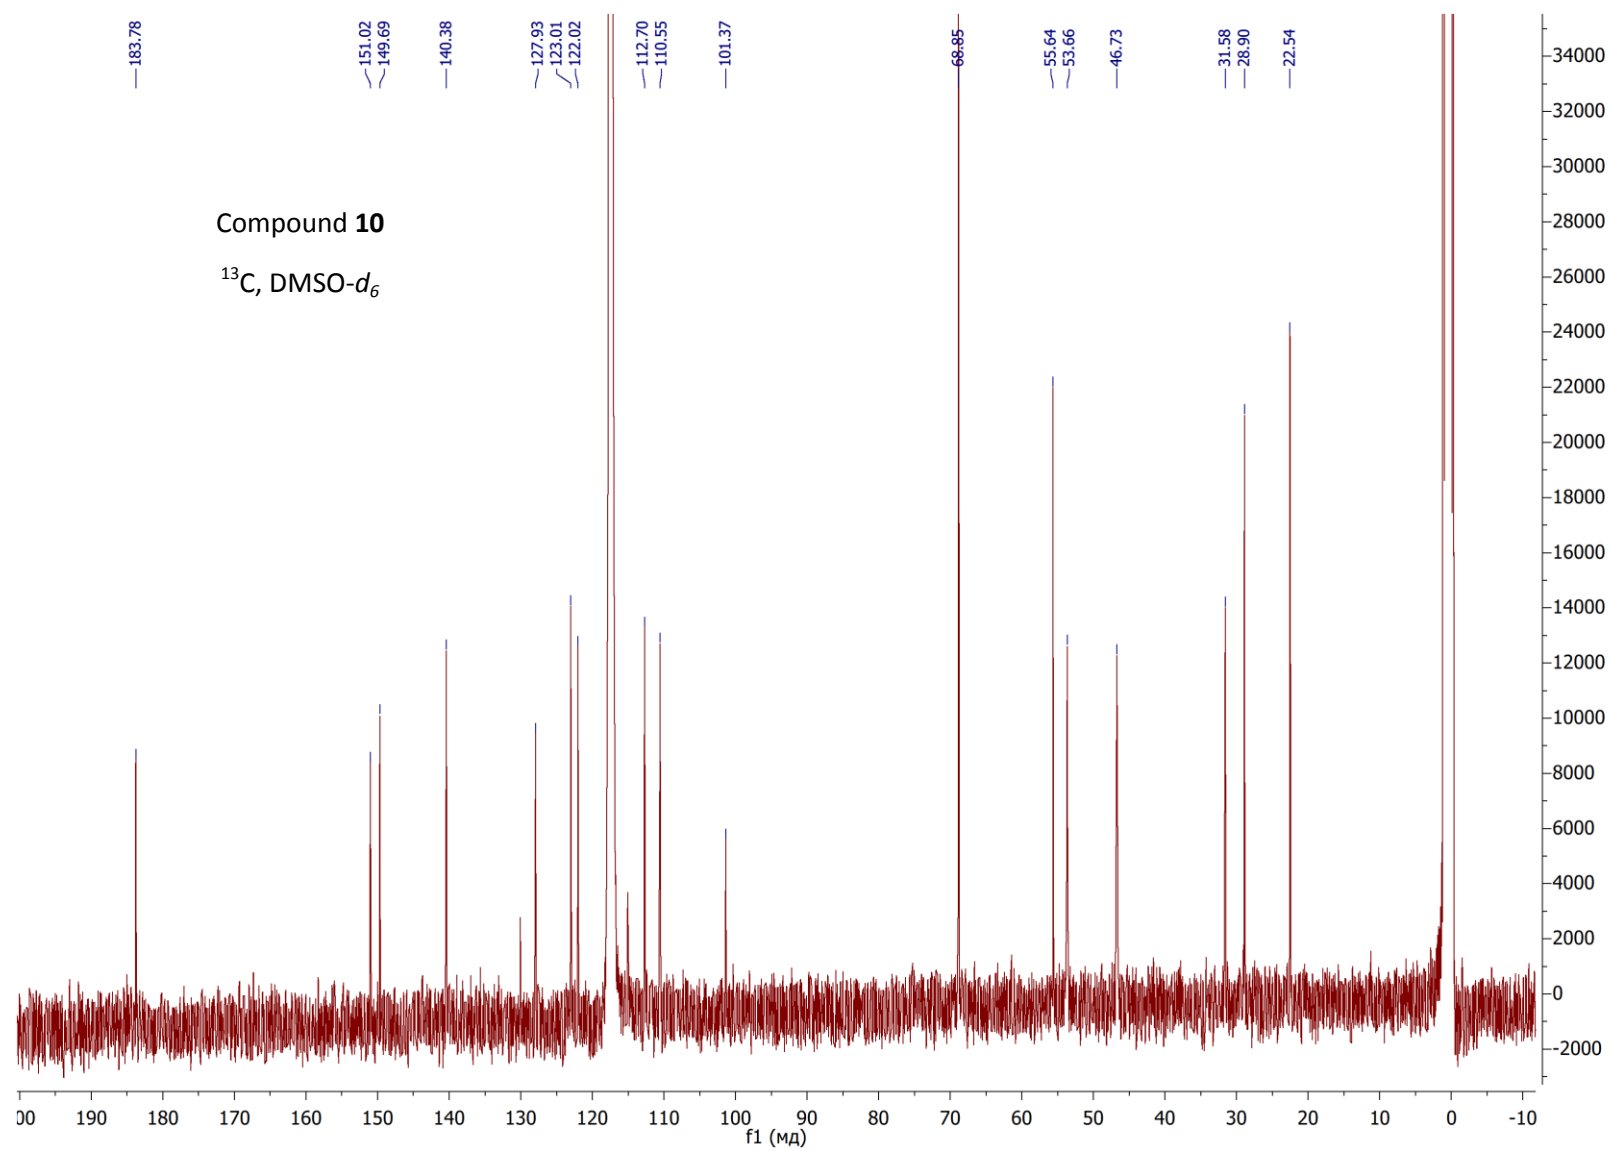

Figure S24.  $^{13}\text{C}$  NMR spectrum of compound 7
